# Supplementary material for: c-Src-induced vascular malformations require localised matrix degradation at focal adhesions
Source: PubMed Central journal article supplement (PMC11267457; doi:10.1242/jcs.262101), 2024-07-10
Supplement: joces-137-262101-s1.pdf [file joces-137-262101-s1.pdf]

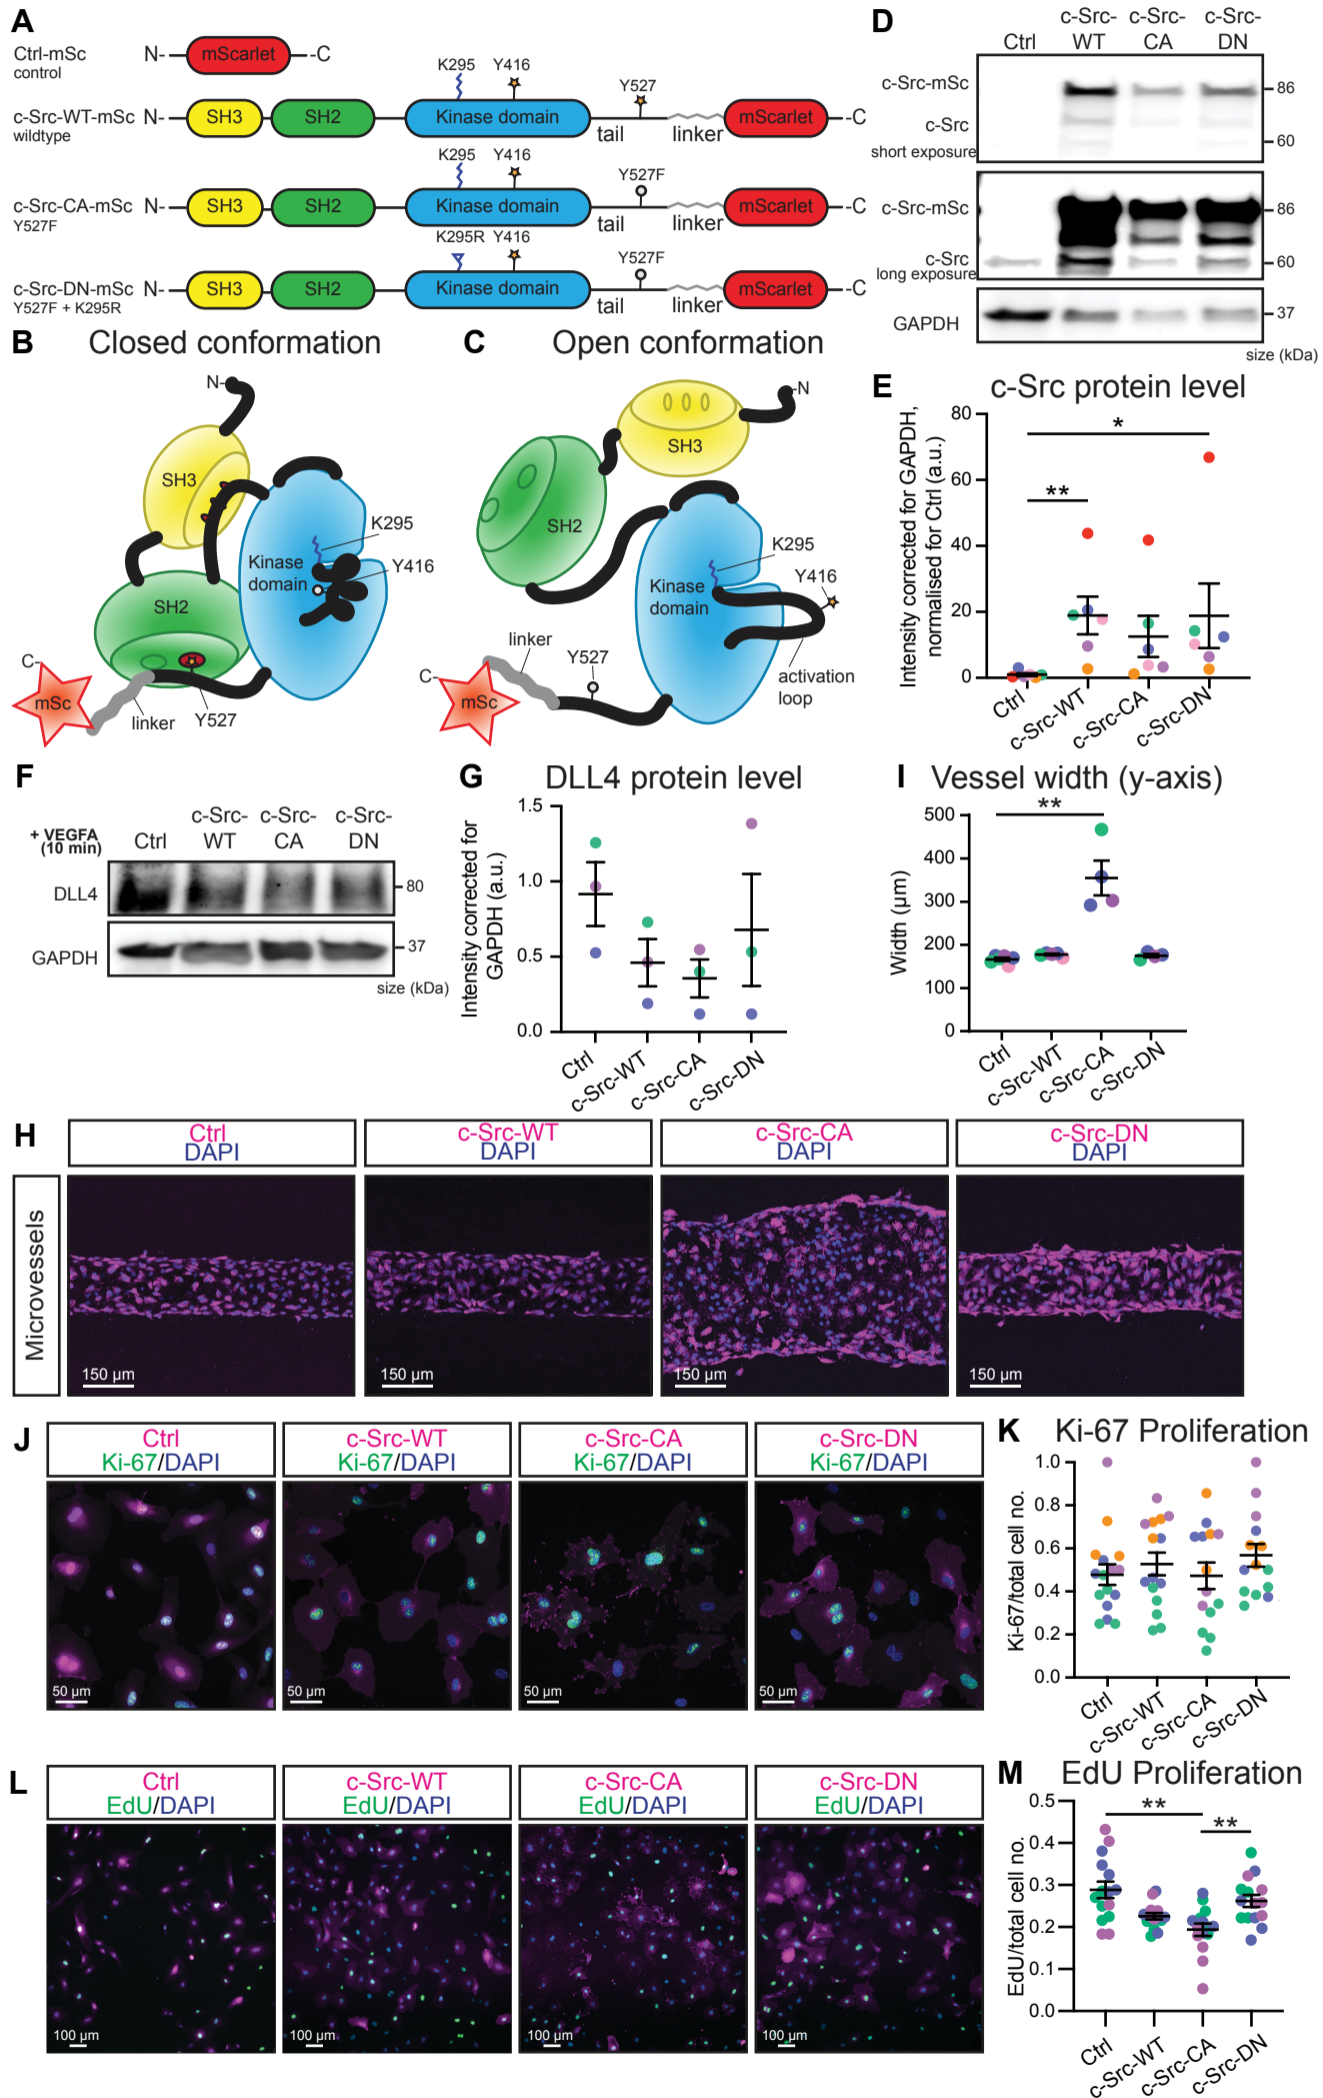

**Fig. S1. Expression of c-Src mutants in endothelial cells.**

(A) Schematic of constructs: Control (Ctrl-mSc) containing an empty vector with mScarlet, wildtype c-Src (c-Src-WT-mSc) containing c-Src with C-terminal mScarlet tag, constitutive active c-Src (c-Src-CA-mSc) containing c-Src with a Y527F point mutation, dominant negative c-Src (c-Src-DN-mSc) containing c-Src with a double point mutation at Y527F and K295R sites. (B) Schematic of c-Src in closed conformation due to phosphorylated autoinhibitory Tyr527 site binding to the SH2 domain. (C) Schematic of c-Src in open conformation due to dephosphorylation of Tyr527, exposing the SH2 and SH3 domains for binding of target proteins, and the activation loop including Y416 for phosphorylation and activation of c-Src. (D) Representative Western blot of HUVEC transduced with mScarlet-tagged control, c-Src or c-Src mutants, showing endogenous c-Src at 60 kDa and overexpressing c-Src-mScarlet at 86 kDa. GAPDH was used as loading control. (E) Quantification of c-Src protein expression levels. n = 6 independent experiments. (F) Representative Western blot of HUVEC transduced with mScarlet-tagged control, or c-Src mutants stimulated with 100 ng/ml VEGF-A for 10 minutes, showing DLL4. GAPDH was used as loading control. (G) Quantification of DLL4 protein expression levels. n = 3 independent experiments. (H) Representative images of HAECs transduced with mScarlet-tagged c-Src mutants (magenta) seeded in PDMS microfluidic vessels containing 2.5 mg/mL collagen matrix for 3 days before fixing. Immunofluorescent staining was performed for nuclei (DAPI; blue). (I) Quantification of vessel width. n = 3-4 independent experiments, 1-2 vessels per replicate with each data point representing an average of 3-5 measurements per vessel. (J) Representative images of sub-confluent mScarlet-tagged c-Src mutant HUVECs (magenta) grown overnight before fixing. Immunofluorescent staining was performed for proliferating cells (Ki-67; green) and nuclei (DAPI; blue). (K) Quantification of proliferation in sub-confluent monolayers measured by ratio of Ki-67-positive cells to total number of cells. n = 4 independent experiments. (L) Representative images of sub-confluent mScarlet-tagged c-Src mutant HUVECs (magenta) grown overnight before 2h Edu incorporation. Click chemistry was performed for proliferating cells (EdU; green) and immunofluorescent staining for nuclei (DAPI; blue). (M) Quantification of proliferation in sub-confluent monolayers measured by ratio of EdU-positive cells to total number of cells. n = 3 independent experiments. All data are represented as mean  $\pm$  SEM with individual data point indicated and colours represent independent experiments. Statistical significance was determined using Kruskal-Wallis test with Dunn's multiple comparisons (E, G, I, K, M). \* p<0.05, \*\* p<0.01



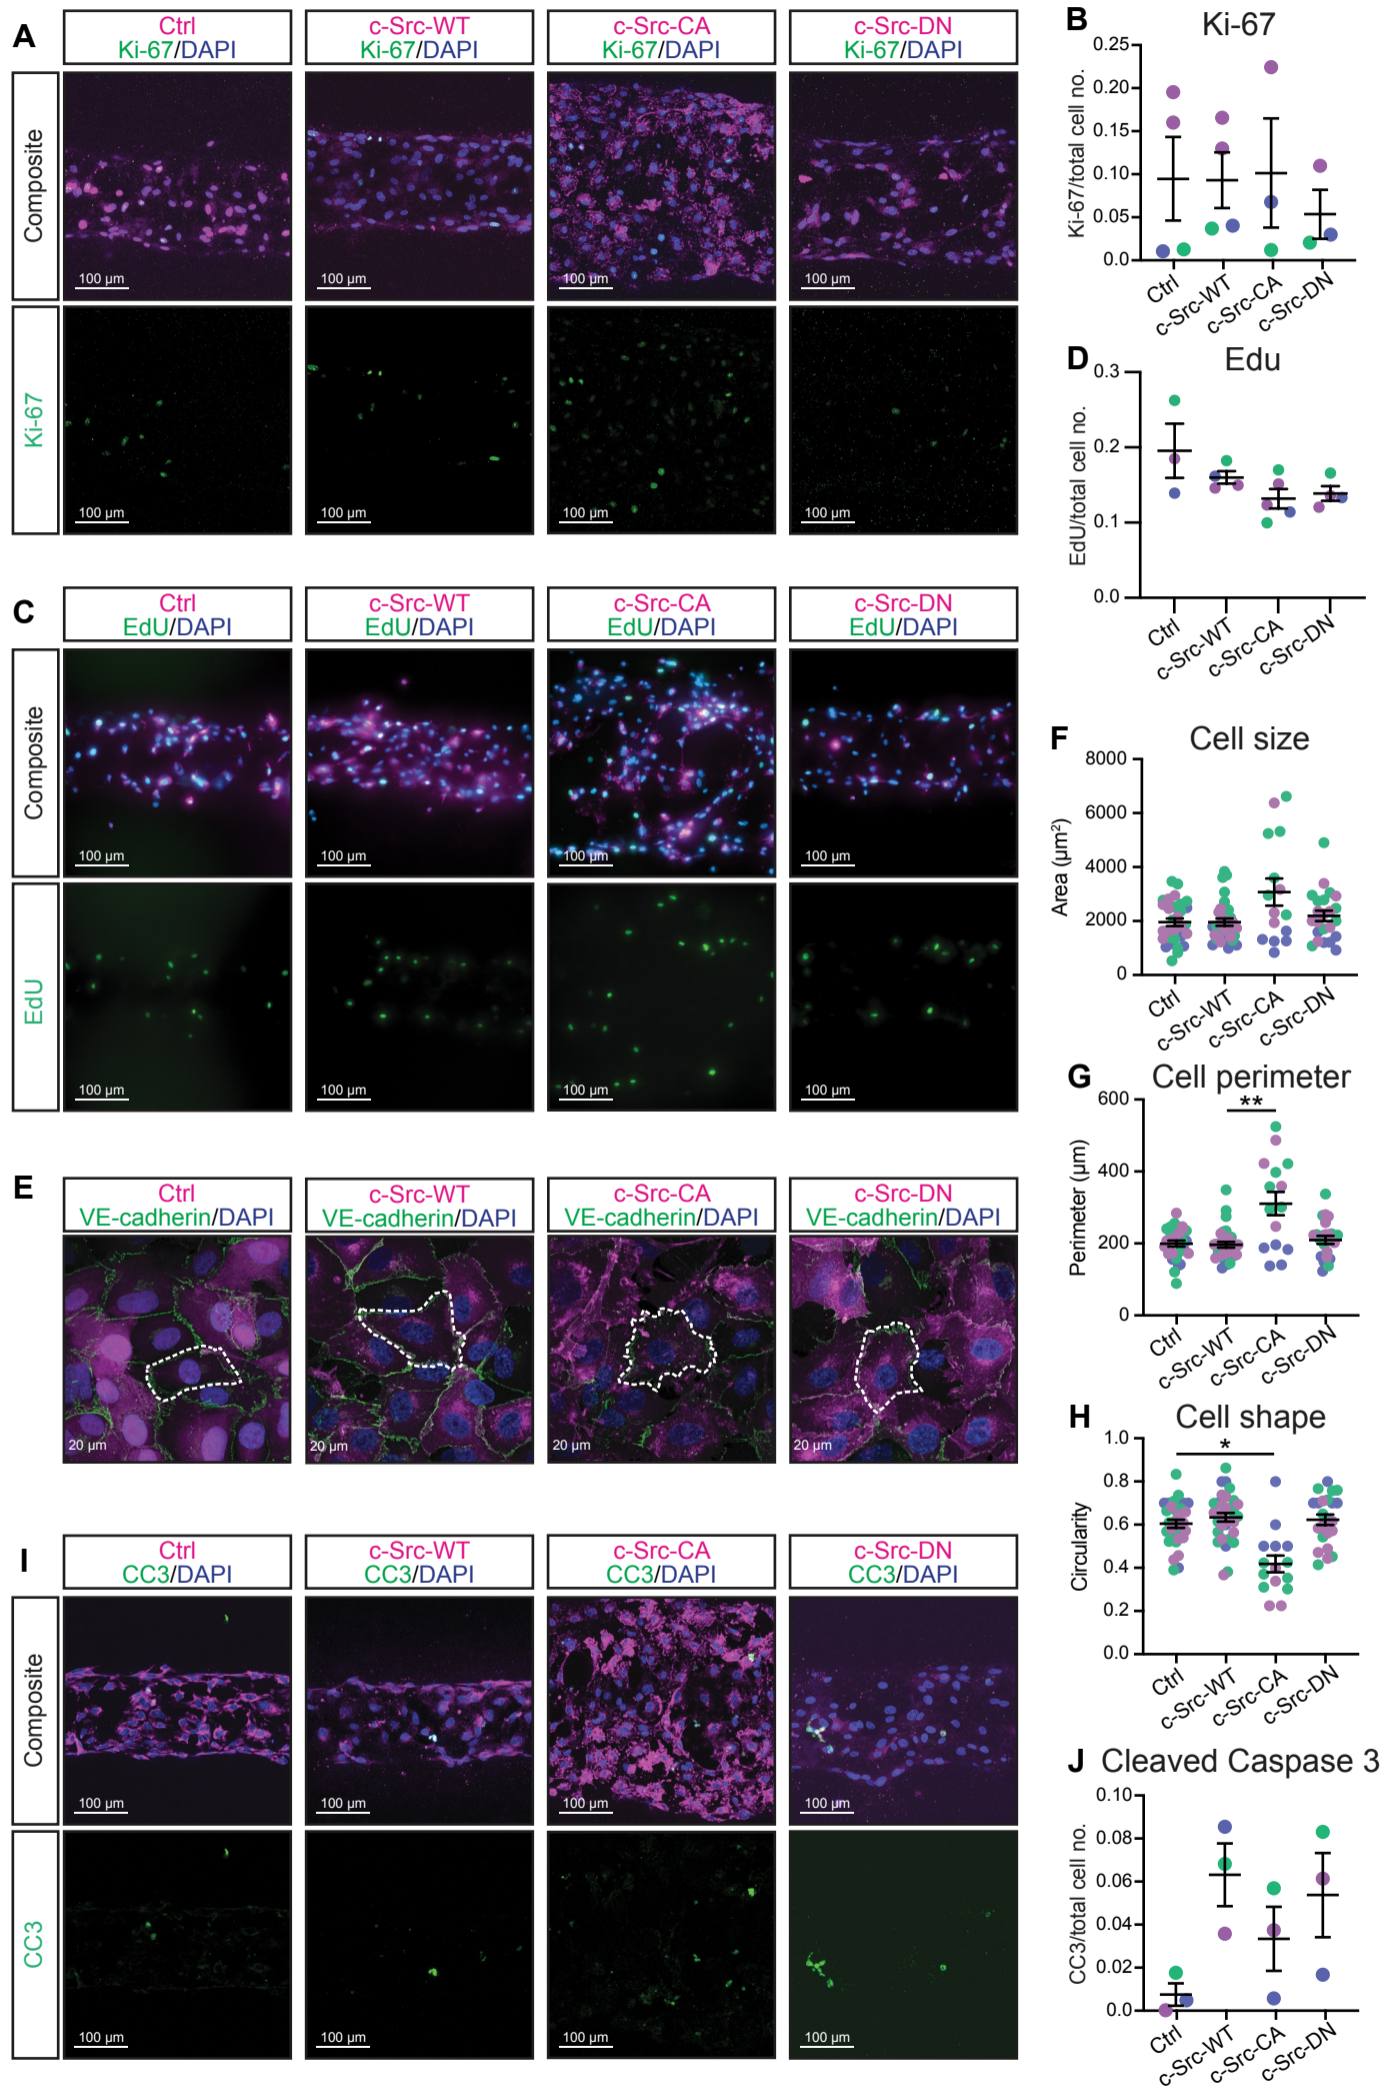

**Fig. S2. Effects of constitutively active c-Src on proliferation and apoptosis in 3D culture.**

**(A)** Representative images of mScarlet-tagged c-Src mutant HUVECs (magenta) seeded in PDMS microfluidic vessels containing 2.5 mg/mL collagen matrix for 3 days before fixing. Immunofluorescent staining was performed for proliferating cells (Ki-67; green) and nuclei (DAPI; blue). Bottom panel shows individual Ki-67 channel in green. **(B)** Quantification of proliferation in 3D microfluidic vessels measured by ratio of Ki-67-positive cells to total number of cells.  $n = 3$  independent experiments with 1-2 vessels per replicate. **(C)** Representative images of mScarlet-tagged c-Src mutant HUVECs (magenta) seeded in PDMS microfluidic vessels containing 2.5 mg/mL collagen matrix for 3 days before 2h Edu incorporation and fixing. Click chemistry was performed for proliferating cells (EdU; green) and immunofluorescent staining for nuclei (DAPI; blue). Bottom panel shows individual EdU channel in green. **(D)** Quantification of proliferation in 3D microfluidic vessels measured by ratio of EdU-positive cells to total number of cells.  $n = 3$  independent experiments. **(E)** Representative images of mScarlet-tagged c-Src mutant HUVECs (magenta) grown to confluent monolayer before fixing and immunofluorescent staining was performed for VE-cadherin (green) and nuclei (DAPI; blue). Cell borders outlined in white. Quantification of confluent monolayers for cell size **(F)**, cell perimeter **(G)**, and cell shape **(H)**.  $n = 3$  independent experiments. **(I)** Representative images of mScarlet-tagged c-Src mutant HUVECs (magenta) seeded in PDMS microfluidic vessels containing 2.5 mg/mL collagen matrix for 3 days before fixing. Immunofluorescent staining was performed for apoptotic cells (Cleaved Caspase 3 – CC3; green) and nuclei (DAPI; blue). Bottom panel shows individual CC3 channel in green. **(J)** Quantification of apoptosis in 3D microfluidic vessels measured by ratio of Cleaved Caspase 3-positive cells to total number of cells.  $n = 3$  independent experiments with 1 vessel per replicate. All data are represented as mean  $\pm$  SEM with individual data point indicated and colours represent independent experiments. Statistical significance was determined using Kruskal-Wallis test with Dunn's multiple comparisons (B, D-F, H). \*  $p < 0.05$ , \*\*  $p < 0.01$ .



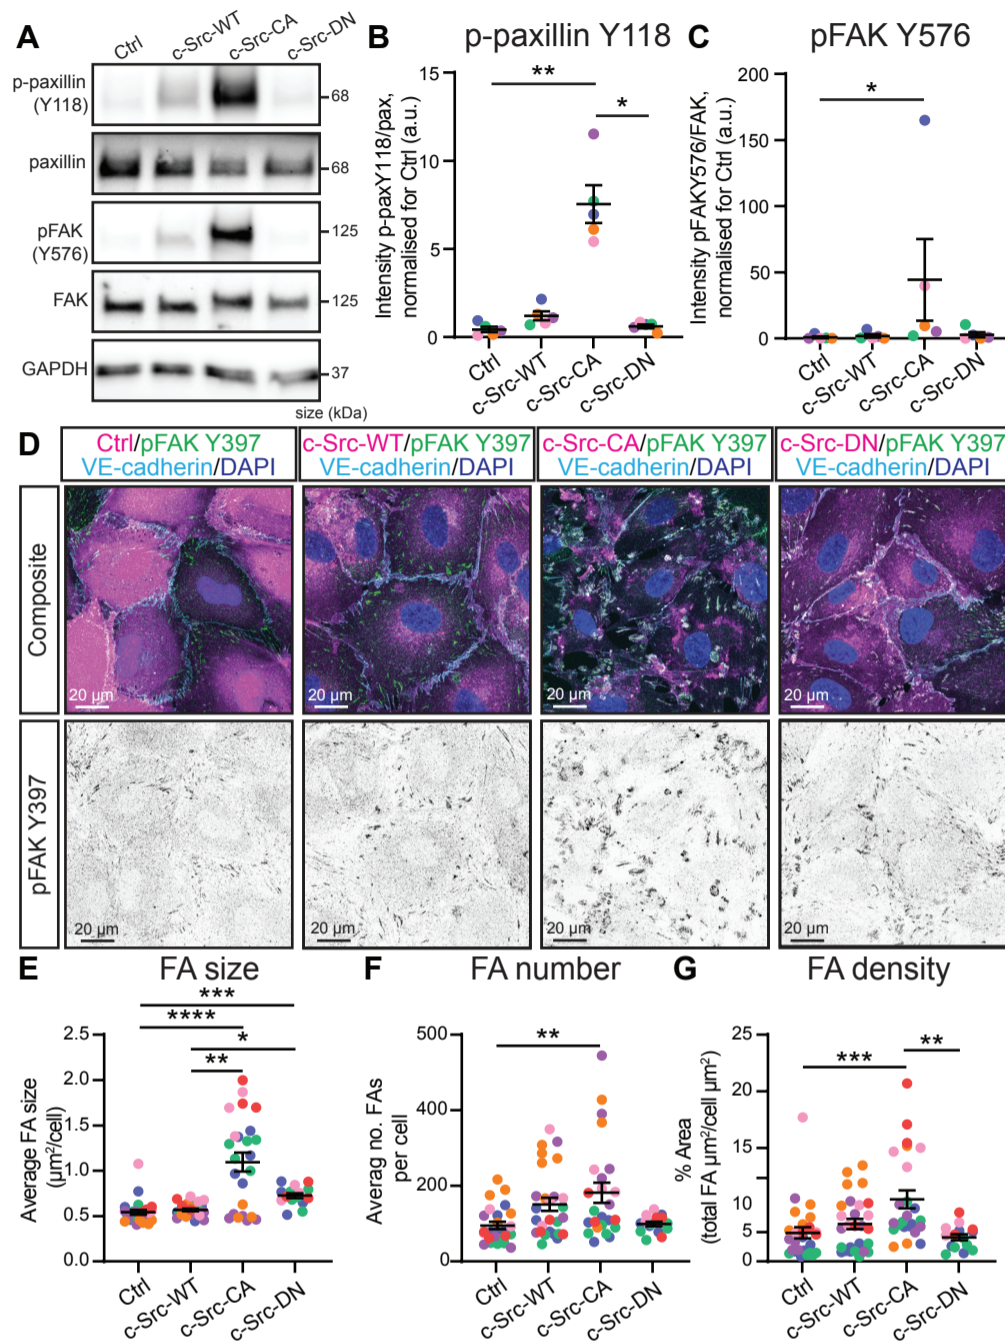

**Fig. S3. Effects of constitutively active c-Src on paxillin and FAK.**

(A) Representative Western blot for phosphorylation of paxillin (Y118) and FAK(Y576) in HUVECs transduced with c-Src mutant cells. (B) Quantification of paxillin phosphorylation on Y118 in relation to total paxillin corrected for loading control (GAPDH) and normalised to control cells. n = 5 independent experiments. (C) Quantification of FAK phosphorylation on Y576 in relation to total FAK corrected for loading control (GAPDH) and normalised to control cells. n = 5 independent experiments. (D) Representative images of confluent monolayers of mScarlet-tagged c-Src mutant HUVECs (magenta) fixed and immunofluorescent staining was performed for phospho-FAK (Y397; green, shown as individual black channel in bottom panel), VE-cadherin (cyan), and nuclei (DAPI; blue). Quantification of average focal adhesion size (E), number (F), and density (G) per cell. n = 4-6 independent experiments, 5 images per replicate with each data point representing an average of 3-5 cells per image. All data are represented as mean  $\pm$  SEM with individual data point indicated and colours represent independent experiments. Statistical significance was determined using Kruskal-Wallis test with Dunn's multiple comparisons (B, C, E-G). The mean value of each individual replicate and corresponding SEM, instead of all data points separately, was used for statistical analysis (E-G). \*  $p < 0.05$ , \*\*  $p < 0.01$ , \*\*\*  $p < 0.0005$ , \*\*\*\*  $p < 0.0001$ .

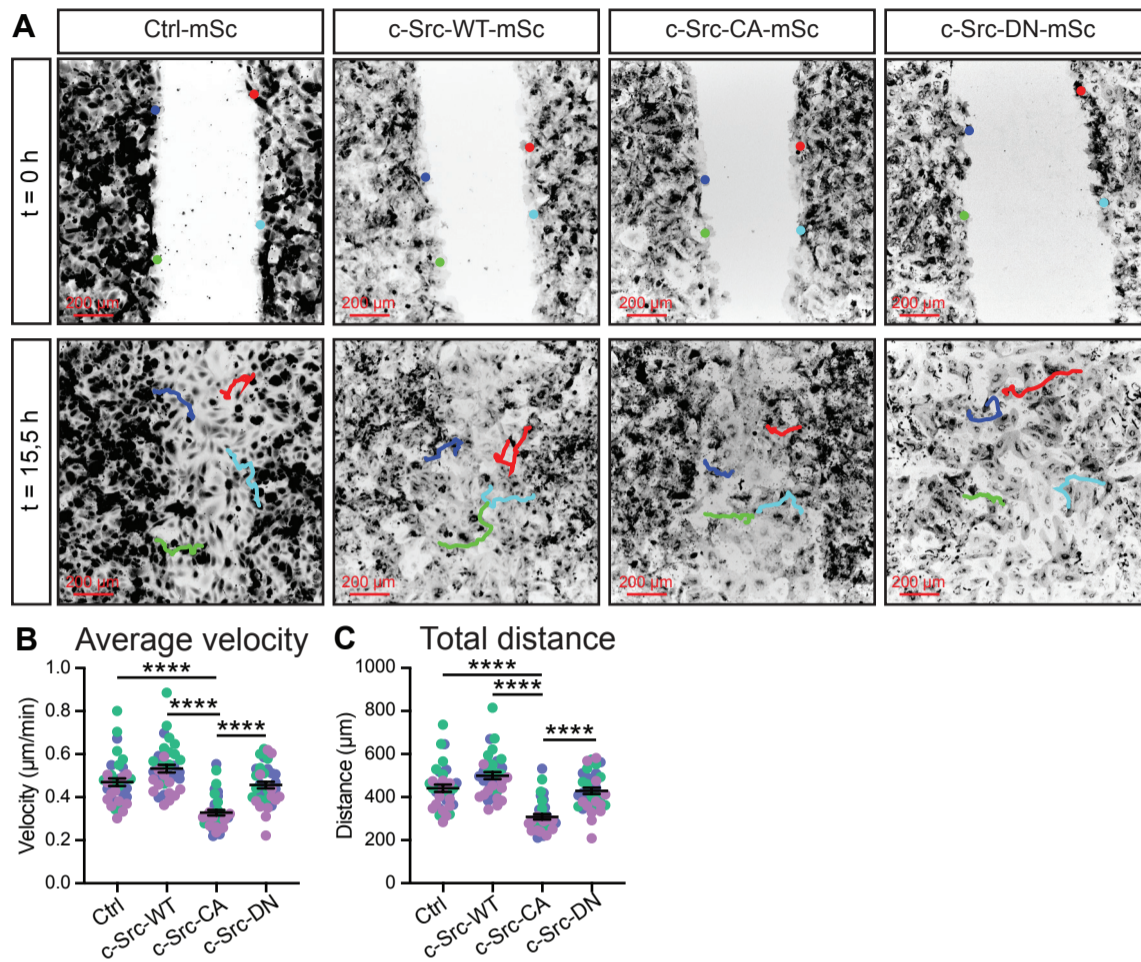

**Fig. S4. Constitutively active c-Src reduces cell migration in 2D.**

(A) Representative still images of mScarlet-tagged c-Src mutant HUVEC migrating in a scratch assay over the course of 15.5 h. Individual tracked cell paths are highlighted.  $n = 3$  independent experiments. Quantification of average velocity (B), and total distance travelled within 15.5 h (C). All data are represented as mean  $\pm$  SEM with individual data point indicated and colours represent independent experiments. Statistical significance was determined using Kruskal-Wallis test with Dunn's multiple comparisons (B, C). \*\*\*\*  $p < 0.0001$ .



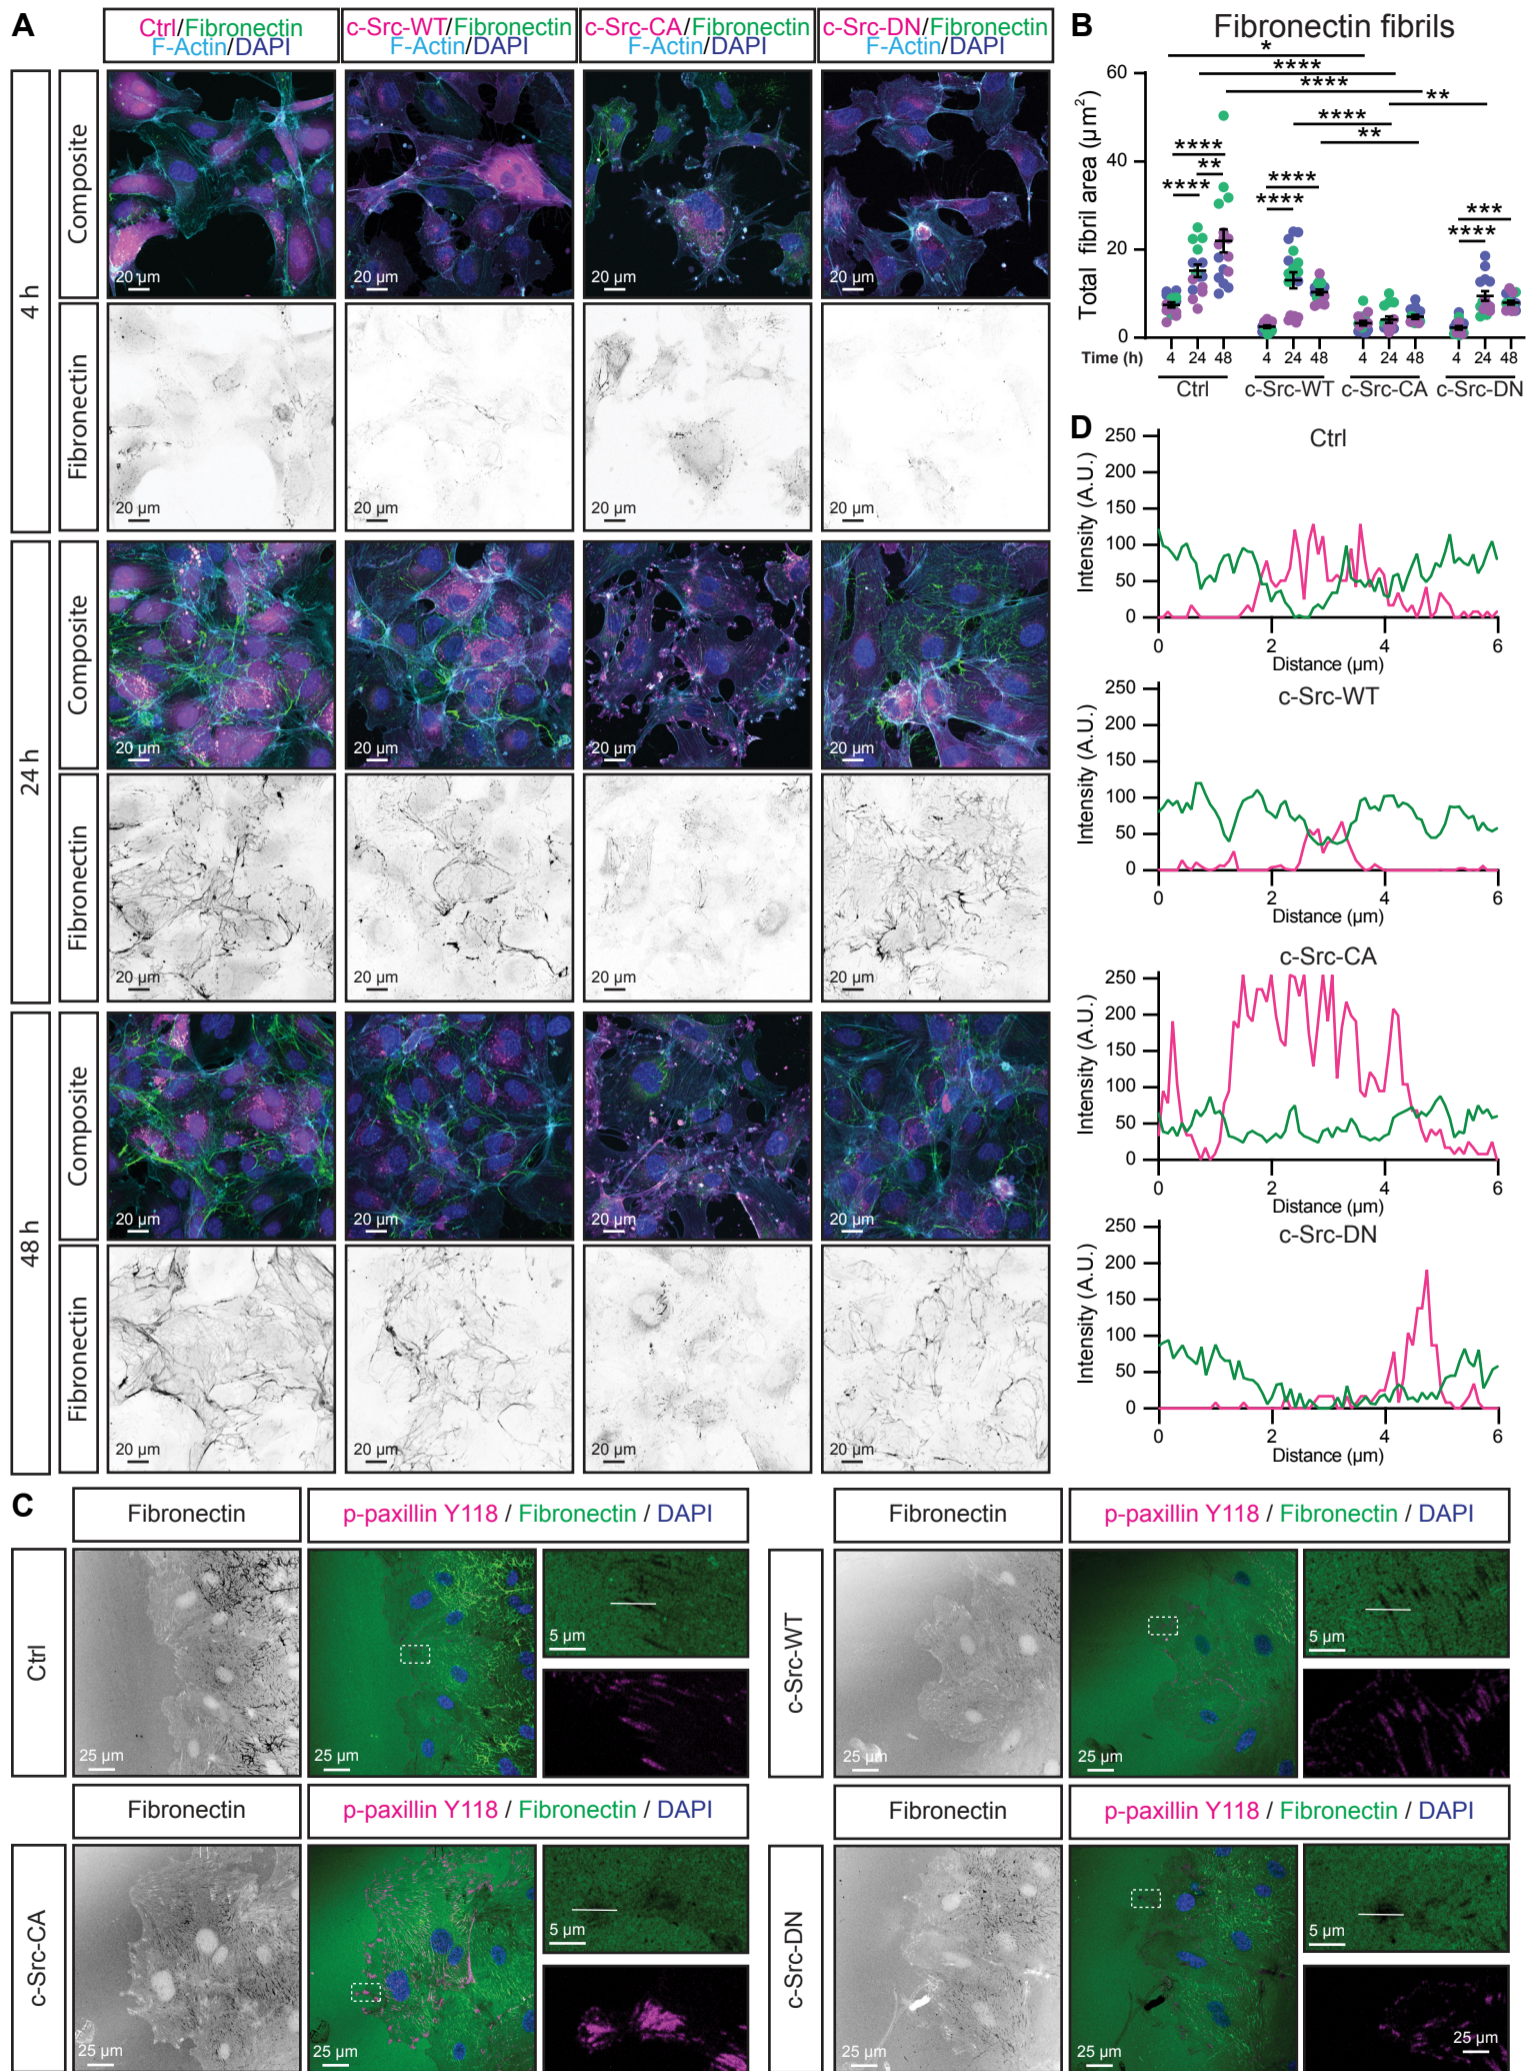



**Fig. S5. Fibronectin fibril deposition is inhibited by constitutively active c-Src.**

**(A)** Representative images of mScarlet-tagged c-Src mutant HUVECs (magenta) grown on uncoated glass for 4, 24 or 48 h to allow fibronectin deposition and remodelling before fixing. Immunofluorescent staining was performed for fibronectin (green, shown as individual black channel in bottom panels), F-Actin (Phalloidin; cyan), and nuclei (DAPI; blue). **(B)** Quantification of total fibronectin fibril area per image.  $n = 3$  independent experiments. **(C)** Representative confocal images of mScarlet-tagged c-Src mutant HUVECs grown in Ibidi culture inserts on fibronectin. Cells were allowed to migrate after insert removal for 3 h before fixing. Immunofluorescent staining was performed for fibronectin (green), focal adhesions (p-paxillin Y118; magenta) and nuclei (DAPI; blue). Single channel fibronectin panel shows degradation spots lack IF signal (white). White dashed box indicates region of higher magnification, single channel images show next to the merge, white lines indicate area used to generate intensity plots. **(D)** Intensity plots of areas of interest indicated by white lines in (C) to demonstrate a decrease in fibronectin (green) intensity at sites of increased focal adhesion signal (magenta). All lines are 6  $\mu\text{m}$  and traverse through a focal adhesion. All data are represented as meanSEM with individual data point indicated and colours represent independent experiments. Statistical significance was determined using two-way ANOVA with Turkey's multiple comparisons test (B). \*  $p < 0.05$ , \*\*  $p < 0.01$ , \*\*\*  $p < 0.0005$ , \*\*\*\*  $p < 0.0001$ .

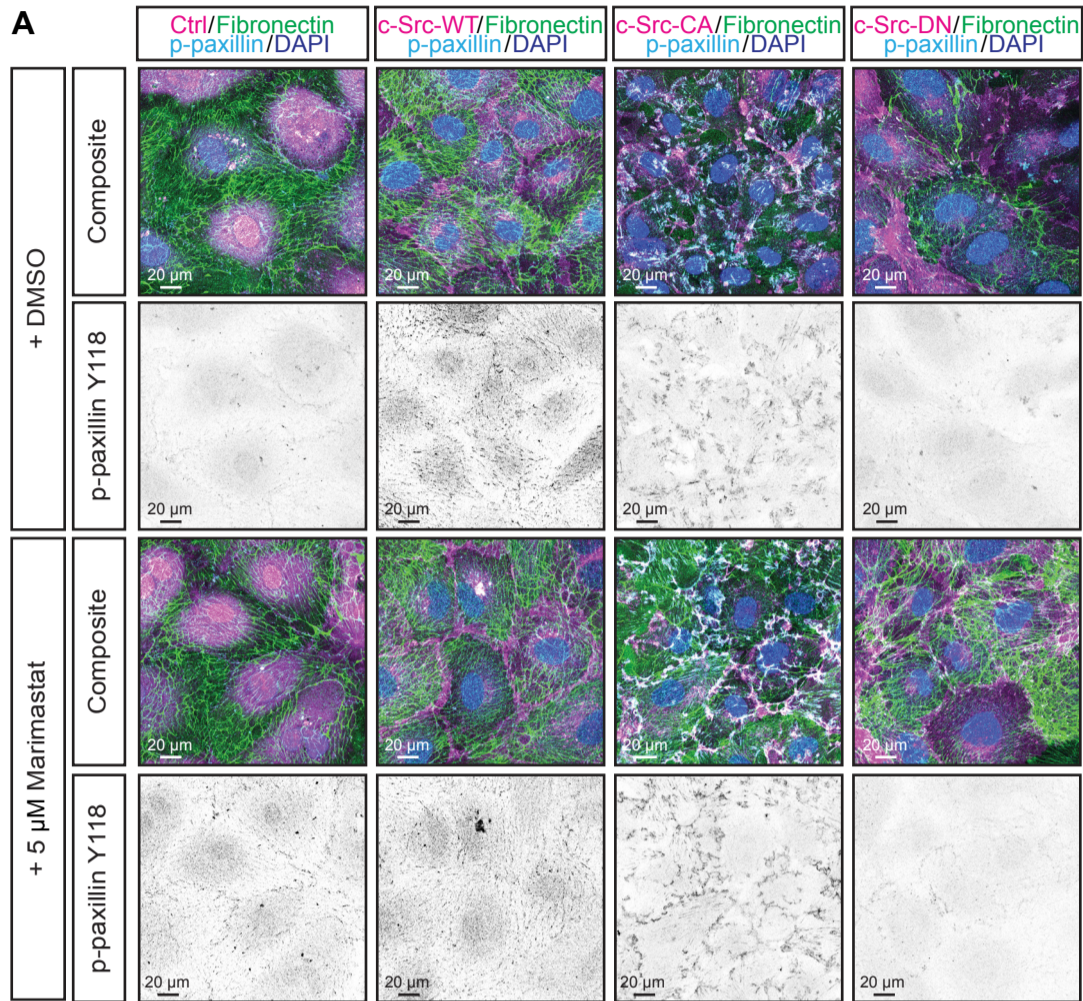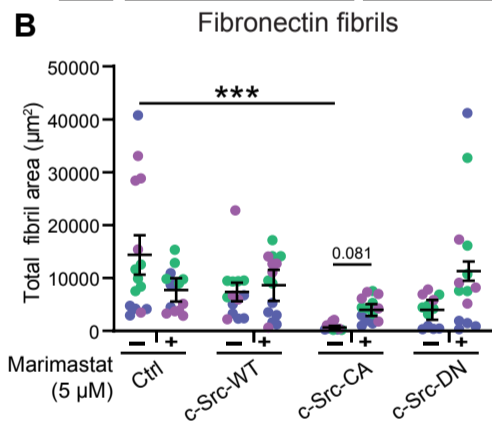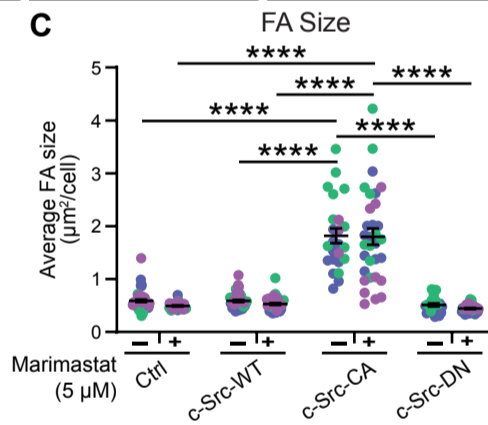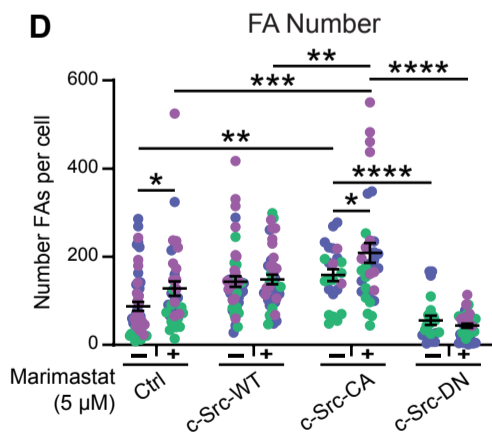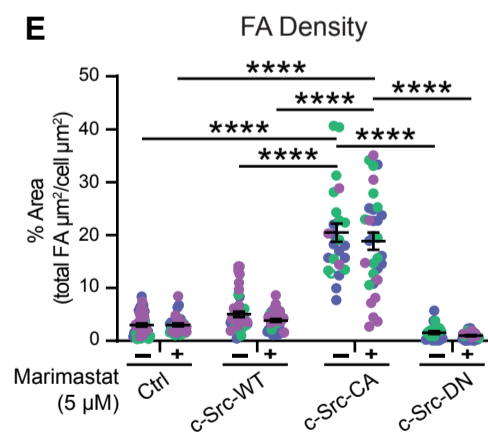

**Fig. S6. MMP inhibition rescues fibronectin fibril depositions but focal adhesion upregulation is not affected.**

(A) Representative images of mScarlet-tagged c-Src mutant HUVECs (magenta) grown on fibronectin-coated glass and treated with DMSO vehicle control or 5  $\mu$ M Marimastat at 4 h post-seeding. Cells were grown in presence of DMSO or Marimastat for 24 h before fixing and immunostaining for fibronectin (green), phospho-paxillin Y118 (cyan, shown as individual black channel in bottom panels), and nuclei (DAPI; blue). (B) Quantification of total fibronectin fibril area per image. Quantification of average focal adhesion size (C), number (D), and density (E) per cell.  $n = 3$  independent experiments. All data are represented as mean  $\pm$  SEM with individual data point indicated and colours represent independent experiments. Statistical significance was determined using two-way ANOVA with Turkey's multiple comparisons test (B-E). The mean value of each individual replicate and corresponding SEM, instead of all data points separately, was used for statistical analysis (B). \*  $p < 0.05$ , \*\*  $p < 0.01$ , \*\*\*  $p < 0.0005$ , \*\*\*\*  $p < 0.0001$ .



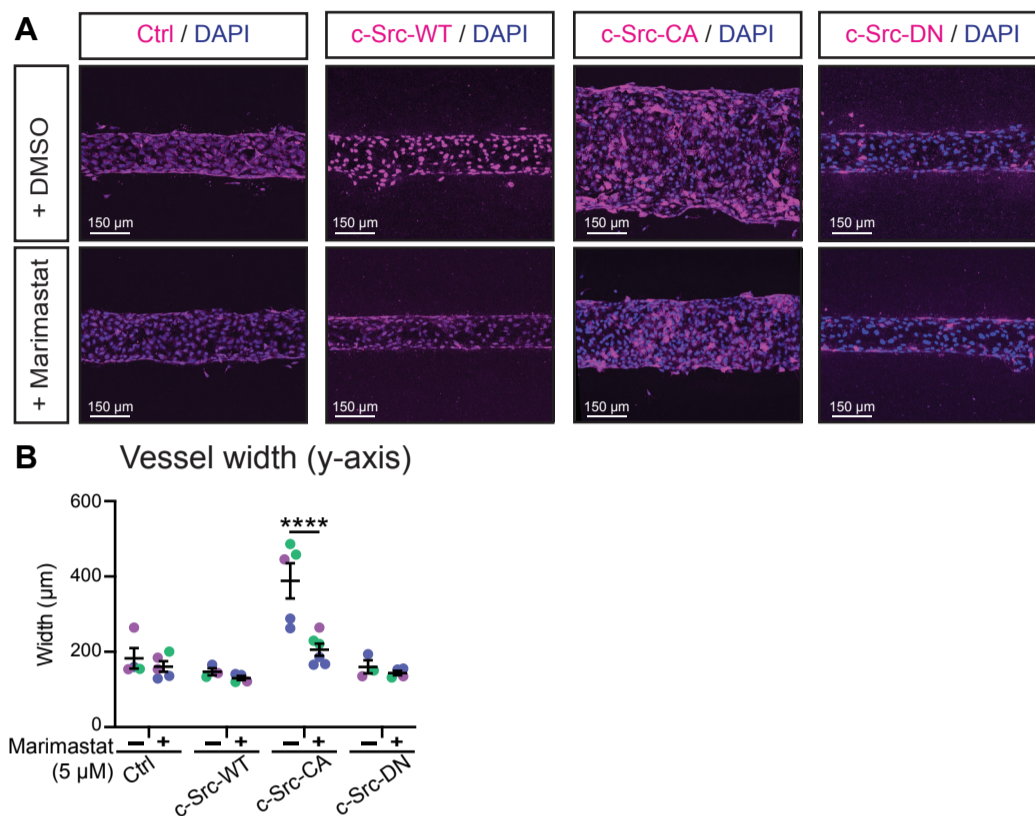

**Fig. S7. Broad spectrum MMP inhibitor Marimastat rescues vascular ballooning in constitutively active c-Src in 3D microvessels with HAEC.**

(A) Representative images of HAECs transduced with mScarlet-tagged c-Src mutants (magenta) seeded in PDMS microfluidic vessels containing 2.5 mg/mL collagen matrix for 3 days and treated daily with DMSO vehicle control or 5 μM Marimastat before fixing. Immunofluorescent staining was performed for nuclei (DAPI; blue). (B) Quantification of vessel width. n = 3 independent experiments, 3 images per replicate with each data point representing an average of 5 measurements per image. All data are represented as mean ± SEM with individual data point indicated and colours represent independent experiments. Statistical significance was determined using two-way ANOVA with Sidak's multiple comparisons test. The mean value of each individual replicate and corresponding SEM, instead of all data points separately, was used for statistical analysis (B). \*\*\*\* p<0.0001.

**Fig 3A**

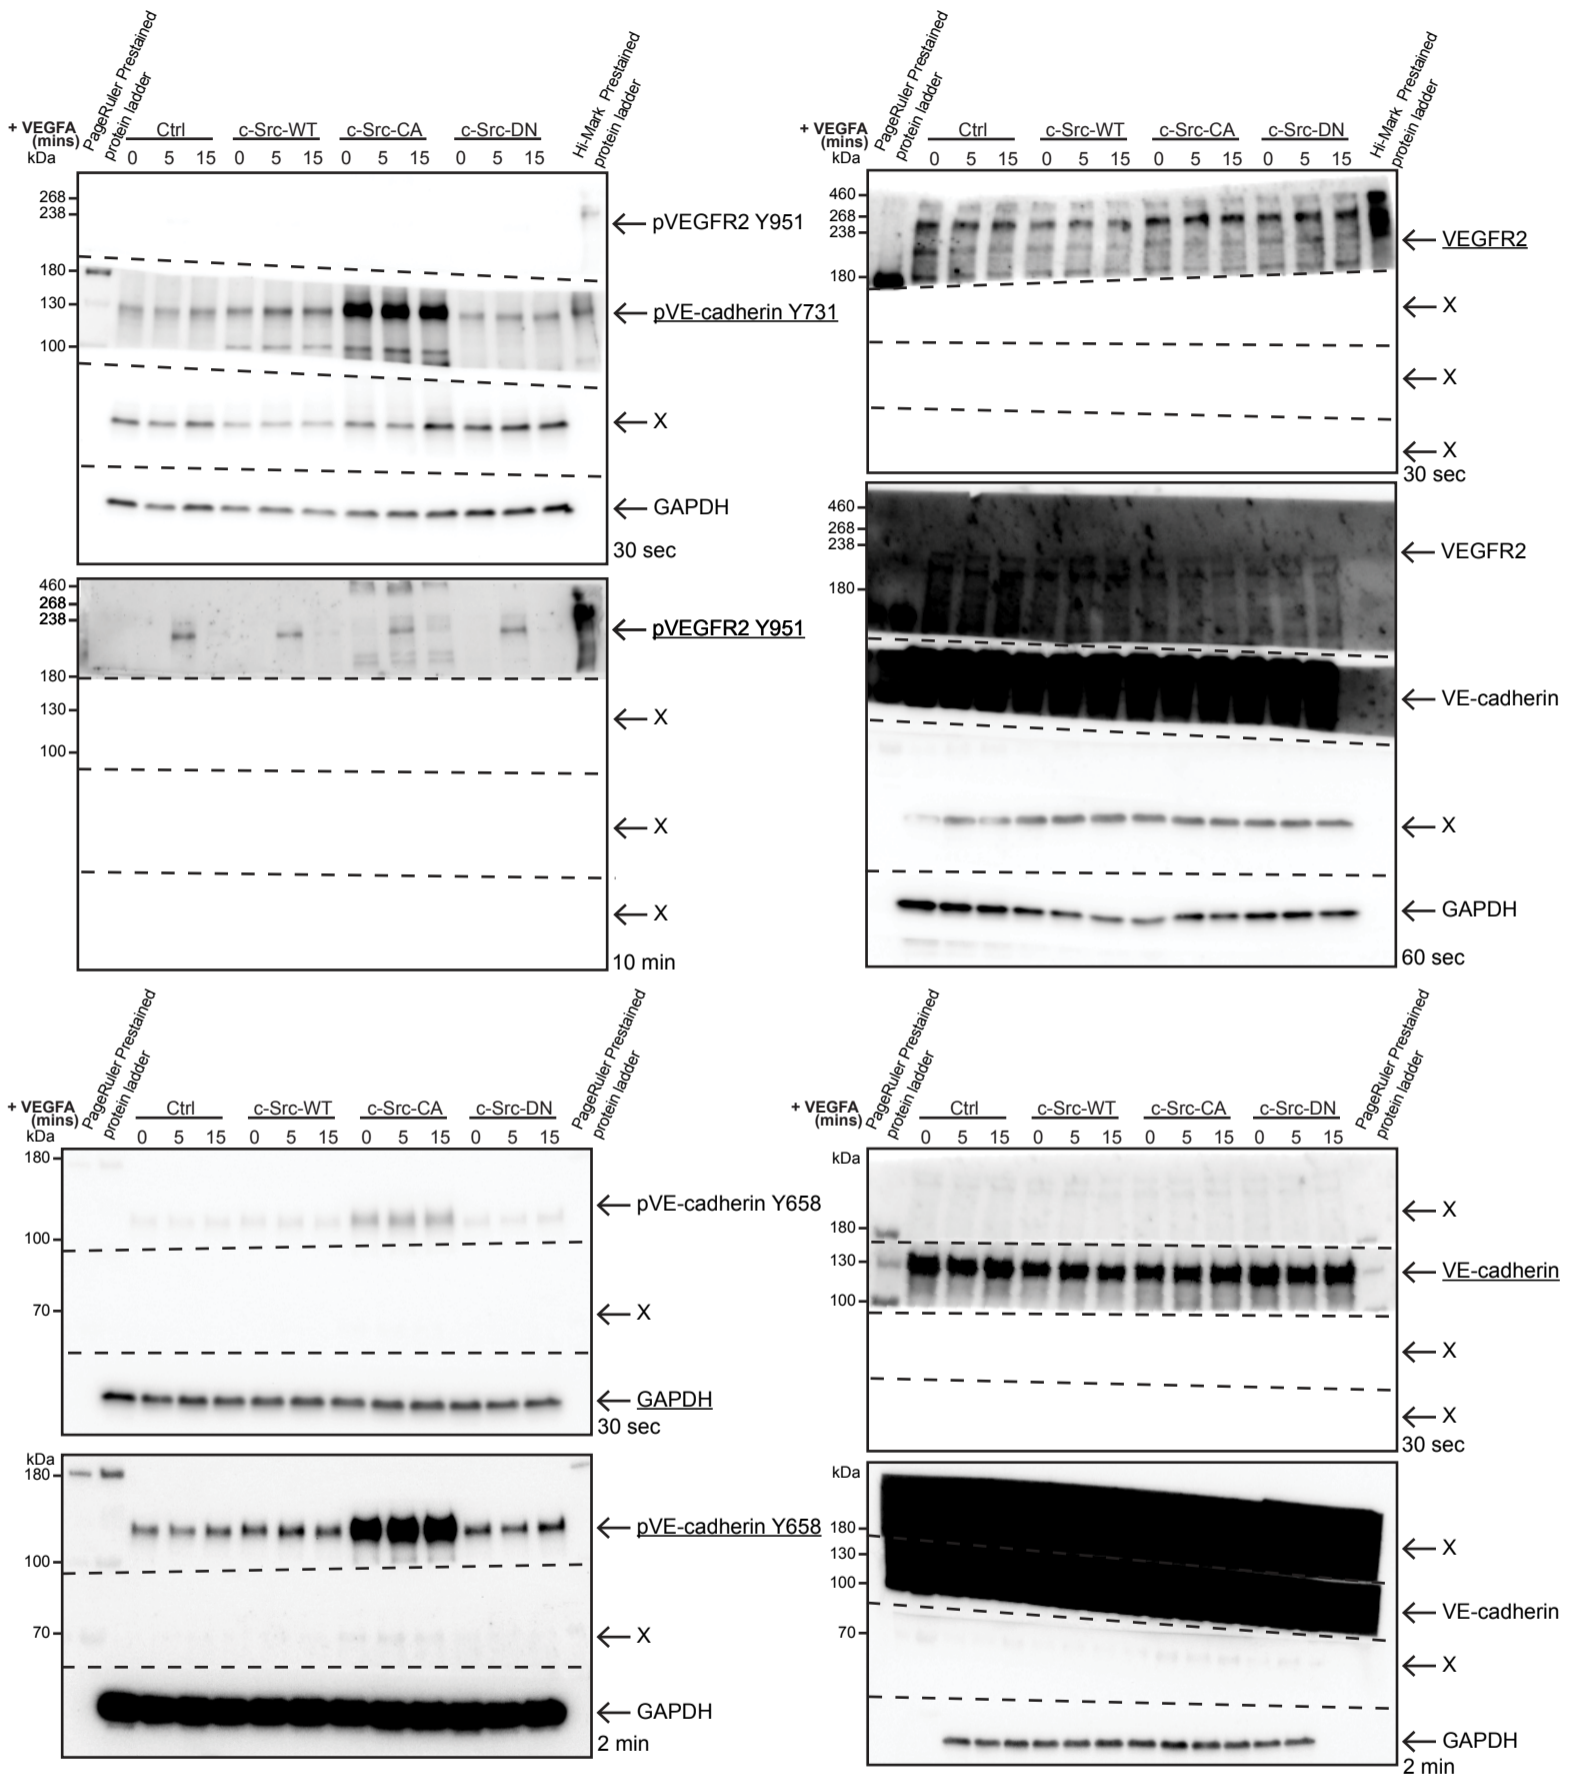

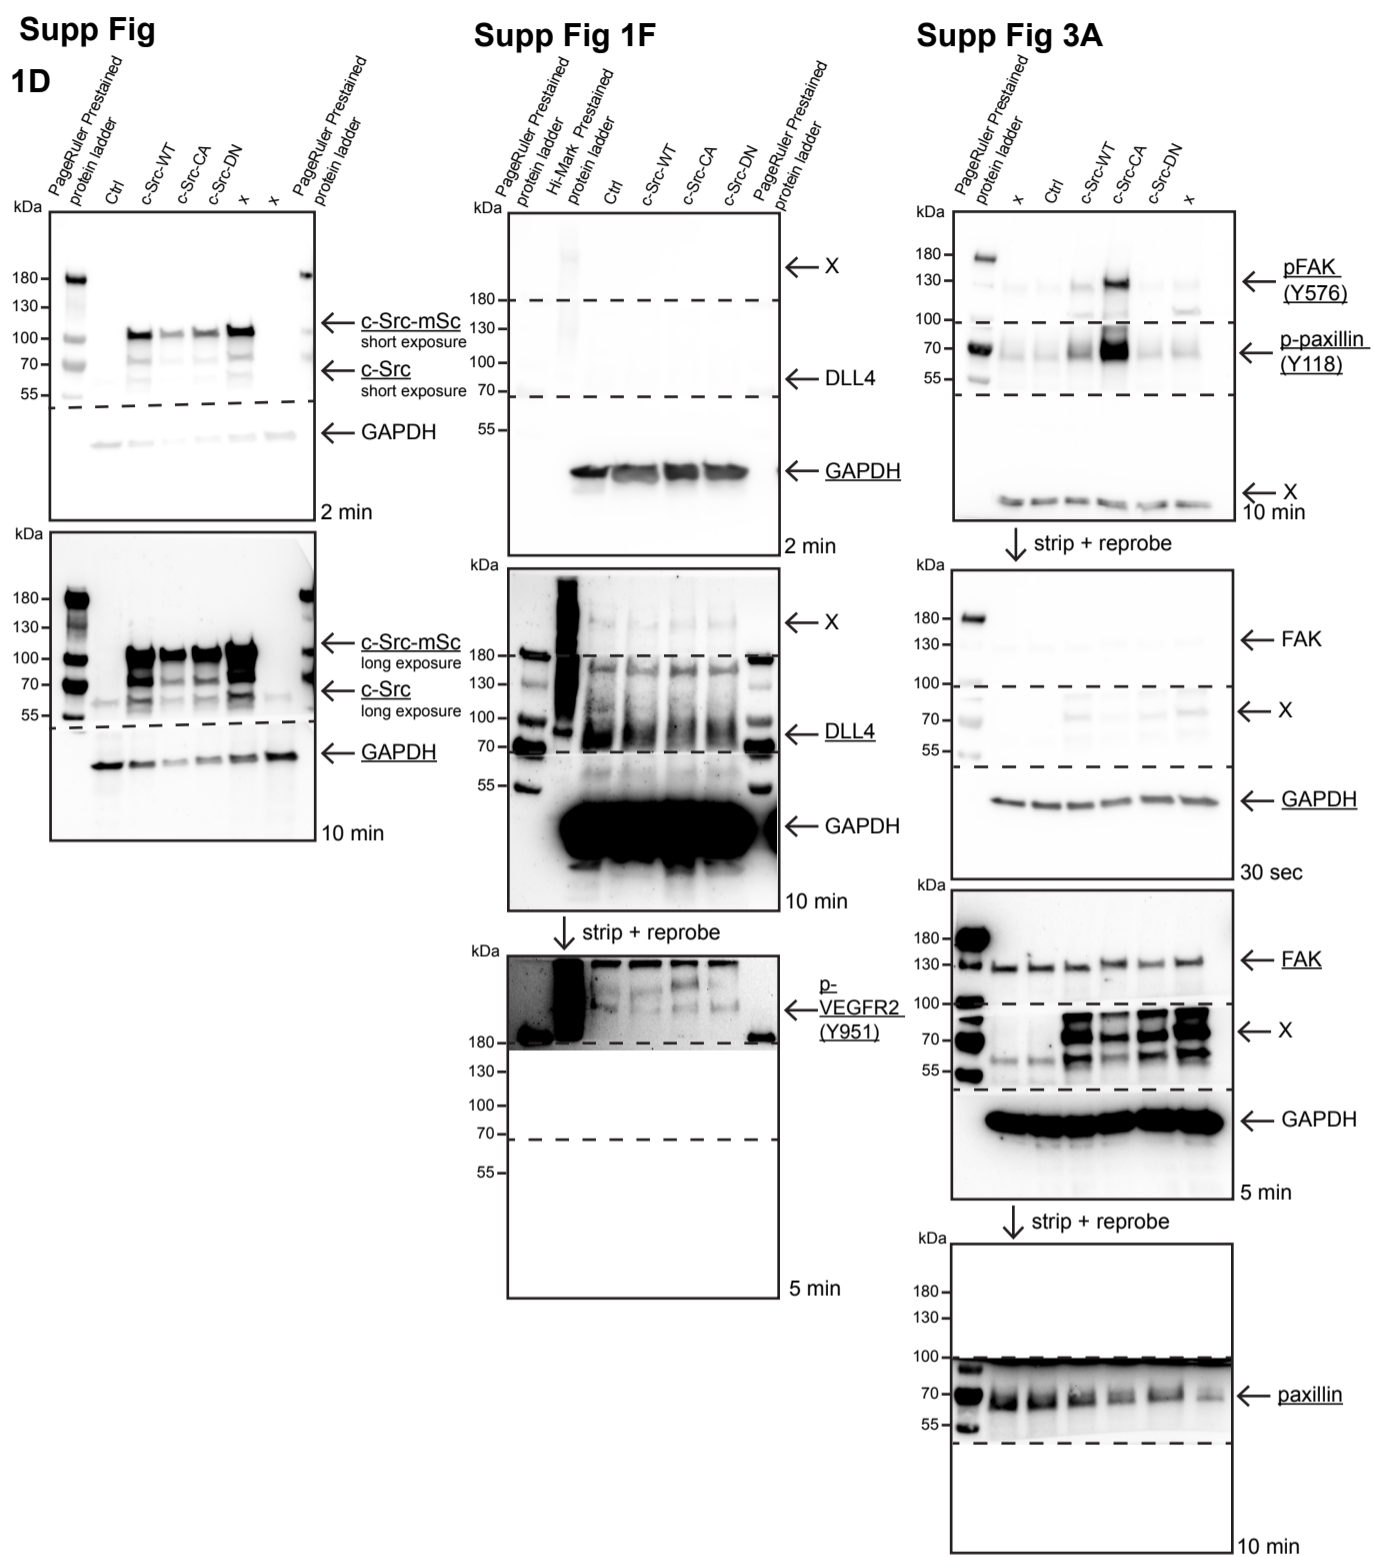

**Fig. S8. Uncropped scans of Western blots.**

Full, uncropped scans of Western blots shown in Fig 3A, Fig. S1D, Fig. S1F, Fig. S3A. Used lanes are labelled as in the corresponding figure, with other lanes labelled as X. Dashed line indicates where membrane was cut. Underlined proteins indicate which blot was used in the corresponding figure and time indicates exposure time.



**Table S1. Summary of all statistical tests and p values.**

List of all the different statistical comparisons that were made per graph and their respective p values.

**Fig. 1B. Vascular area**

| <b>Kruskal-Wallis test</b>              |             |
|-----------------------------------------|-------------|
| P value                                 | <0.0001     |
| Exact or approximate P value?           | Approximate |
| P value summary                         | ****        |
| Do the medians vary signif. (P < 0.05)? | Yes         |
| Number of groups                        | 4           |
| Kruskal-Wallis statistic                | 47.39       |

| <b>Dunn's multiple comparisons test</b> | <b>Summary</b> | <b>Adjusted P Value</b> |
|-----------------------------------------|----------------|-------------------------|
| Ctrl vs. c-Src-WT                       | ns             | >0.9999                 |
| Ctrl vs. c-Src-CA                       | ****           | <0.0001                 |
| Ctrl vs. c-Src-DN                       | ns             | 0.4813                  |
| c-Src-WT vs. c-Src-CA                   | **             | 0.0016                  |
| c-Src-WT vs. c-Src-DN                   | *              | 0.0283                  |
| c-Src-CA vs. c-Src-DN                   | ****           | <0.0001                 |

**Fig. 1C. Sprout number**

| <b>Kruskal-Wallis test</b>              |             |
|-----------------------------------------|-------------|
| P value                                 | <0.0001     |
| Exact or approximate P value?           | Approximate |
| P value summary                         | ****        |
| Do the medians vary signif. (P < 0.05)? | Yes         |
| Number of groups                        | 4           |
| Kruskal-Wallis statistic                | 60.87       |

| <b>Dunn's multiple comparisons test</b> | <b>Summary</b> | <b>Adjusted P Value</b> |
|-----------------------------------------|----------------|-------------------------|
| Ctrl vs. c-Src-WT                       | ns             | 0.0722                  |
| Ctrl vs. c-Src-CA                       | ****           | <0.0001                 |
| Ctrl vs. c-Src-DN                       | ns             | 0.1788                  |
| c-Src-WT vs. c-Src-CA                   | ****           | <0.0001                 |
| c-Src-WT vs. c-Src-DN                   | ****           | <0.0001                 |
| c-Src-CA vs. c-Src-DN                   | **             | 0.0058                  |

**Fig. 1D. Vascular area shape**

| <b>Kruskal-Wallis test</b>              |             |
|-----------------------------------------|-------------|
| P value                                 | <0.0001     |
| Exact or approximate P value?           | Approximate |
| P value summary                         | ****        |
| Do the medians vary signif. (P < 0.05)? | Yes         |
| Number of groups                        | 4           |
| Kruskal-Wallis statistic                | 46.78       |

| <b>Dunn's multiple comparisons test</b> | <b>Summary</b> | <b>Adjusted P Value</b> |
|-----------------------------------------|----------------|-------------------------|
| Ctrl vs. c-Src-WT                       | ns             | >0.9999                 |
| Ctrl vs. c-Src-CA                       | ****           | <0.0001                 |
| Ctrl vs. c-Src-DN                       | ns             | 0.1000                  |
| c-Src-WT vs. c-Src-CA                   | ****           | <0.0001                 |
| c-Src-WT vs. c-Src-DN                   | **             | 0.0019                  |
| c-Src-CA vs. c-Src-DN                   | **             | 0.0094                  |

**Fig. 1E. Cell number per bead**

| <b>Kruskal-Wallis test</b>              |             |
|-----------------------------------------|-------------|
| P value                                 | <0.0001     |
| Exact or approximate P value?           | Approximate |
| P value summary                         | ****        |
| Do the medians vary signif. (P < 0.05)? | Yes         |
| Number of groups                        | 4           |
| Kruskal-Wallis statistic                | 33.13       |

| <b>Dunn's multiple comparisons test</b> | <b>Summary</b> | <b>Adjusted P Value</b> |
|-----------------------------------------|----------------|-------------------------|
| Ctrl vs. c-Src-WT                       | ns             | >0.9999                 |
| Ctrl vs. c-Src-CA                       | ****           | <0.0001                 |
| Ctrl vs. c-Src-DN                       | ns             | >0.9999                 |
| c-Src-WT vs. c-Src-CA                   | ****           | <0.0001                 |
| c-Src-WT vs. c-Src-DN                   | ns             | >0.9999                 |
| c-Src-CA vs. c-Src-DN                   | **             | 0.0012                  |

**Fig. 1G. Vessel Width (Y)**

| <b>Kruskal-Wallis test</b>              |             |
|-----------------------------------------|-------------|
| P value                                 | <0.0001     |
| Exact or approximate P value?           | Approximate |
| P value summary                         | ****        |
| Do the medians vary signif. (P < 0.05)? | Yes         |
| Number of groups                        | 4           |
| Kruskal-Wallis statistic                | 28.06       |

| <b>Dunn's multiple comparisons test</b> | <b>Summary</b> | <b>Adjusted P Value</b> |
|-----------------------------------------|----------------|-------------------------|
| Ctrl vs. c-Src-WT                       | ns             | >0.9999                 |
| Ctrl vs. c-Src-CA                       | **             | 0.0041                  |
| Ctrl vs. c-Src-DN                       | ns             | 0.1787                  |
| c-Src-WT vs. c-Src-CA                   | ns             | 0.0680                  |
| c-Src-WT vs. c-Src-DN                   | *              | 0.0144                  |
| c-Src-CA vs. c-Src-DN                   | ****           | <0.0001                 |

**Fig. 1H. Cell number per vessel**

| <b>Kruskal-Wallis test</b>              |        |
|-----------------------------------------|--------|
| P value                                 | 0.4249 |
| Exact or approximate P value?           | Exact  |
| P value summary                         | ns     |
| Do the medians vary signif. (P < 0.05)? | No     |
| Number of groups                        | 4      |
| Kruskal-Wallis statistic                | 2.988  |

| <b>Dunn's multiple comparisons test</b> | <b>Summary</b> | <b>Adjusted P Value</b> |
|-----------------------------------------|----------------|-------------------------|
| Ctrl vs. c-Src-WT                       | ns             | >0.9999                 |
| Ctrl vs. c-Src-CA                       | ns             | >0.9999                 |
| Ctrl vs. c-Src-DN                       | ns             | >0.9999                 |
| c-Src-WT vs. c-Src-CA                   | ns             | >0.9999                 |
| c-Src-WT vs. c-Src-DN                   | ns             | 0.7457                  |
| c-Src-CA vs. c-Src-DN                   | ns             | >0.9999                 |

**Fig. 1I. Vessel edge irregularity**

| <b>Kruskal-Wallis test</b>    |             |
|-------------------------------|-------------|
| P value                       | 0.0008      |
| Exact or approximate P value? | Approximate |

|                                         |       |
|-----------------------------------------|-------|
| P value summary                         | ***   |
| Do the medians vary signif. (P < 0.05)? | Yes   |
| Number of groups                        | 4     |
| Kruskal-Wallis statistic                | 16.80 |

| Dunn's multiple comparisons test | Summary | Adjusted P Value |
|----------------------------------|---------|------------------|
| Ctrl vs. c-Src-WT                | ns      | >0.9999          |
| Ctrl vs. c-Src-CA                | *       | 0.0208           |
| Ctrl vs. c-Src-DN                | ns      | >0.9999          |
| c-Src-WT vs. c-Src-CA            | ***     | 0.0004           |
| c-Src-WT vs. c-Src-DN            | ns      | 0.4149           |
| c-Src-CA vs. c-Src-DN            | ns      | 0.3191           |

**Fig. 1J. Cell size**

| Kruskal-Wallis test                     |             |
|-----------------------------------------|-------------|
| P value                                 | 0.4325      |
| Exact or approximate P value?           | Approximate |
| P value summary                         | ns          |
| Do the medians vary signif. (P < 0.05)? | No          |
| Number of groups                        | 4           |
| Kruskal-Wallis statistic                | 2.746       |

| Dunn's multiple comparisons test | Summary | Adjusted P Value |
|----------------------------------|---------|------------------|
| Ctrl vs. c-Src-WT                | ns      | >0.9999          |
| Ctrl vs. c-Src-CA                | ns      | >0.9999          |
| Ctrl vs. c-Src-DN                | ns      | >0.9999          |
| c-Src-WT vs. c-Src-CA            | ns      | >0.9999          |
| c-Src-WT vs. c-Src-DN            | ns      | 0.9496           |
| c-Src-CA vs. c-Src-DN            | ns      | >0.9999          |

**Fig. 1K. Cell shape**

| Kruskal-Wallis test                     |             |
|-----------------------------------------|-------------|
| P value                                 | 0.0028      |
| Exact or approximate P value?           | Approximate |
| P value summary                         | **          |
| Do the medians vary signif. (P < 0.05)? | Yes         |
| Number of groups                        | 4           |
| Kruskal-Wallis statistic                | 14.11       |

| Dunn's multiple comparisons test | Summary | Adjusted P Value |
|----------------------------------|---------|------------------|
| Ctrl vs. c-Src-WT                | ns      | >0.9999          |
| Ctrl vs. c-Src-CA                | ns      | 0.7442           |
| Ctrl vs. c-Src-DN                | ns      | 0.0689           |
| c-Src-WT vs. c-Src-CA            | ns      | 0.6113           |
| c-Src-WT vs. c-Src-DN            | *       | 0.0342           |
| c-Src-CA vs. c-Src-DN            | **      | 0.0011           |

**Fig. 1L. Vessel coverage**

| Kruskal-Wallis test                     |             |
|-----------------------------------------|-------------|
| P value                                 | 0.0008      |
| Exact or approximate P value?           | Approximate |
| P value summary                         | ***         |
| Do the medians vary signif. (P < 0.05)? | Yes         |
| Number of groups                        | 4           |
| Kruskal-Wallis statistic                | 16.61       |

| Dunn's multiple comparisons test | Summary | Adjusted P Value |
|----------------------------------|---------|------------------|
| Ctrl vs. c-Src-WT                | ns      | >0.9999          |
| Ctrl vs. c-Src-CA                | **      | 0.0011           |
| Ctrl vs. c-Src-DN                | ns      | >0.9999          |
| c-Src-WT vs. c-Src-CA            | ns      | 0.1025           |
| c-Src-WT vs. c-Src-DN            | ns      | >0.9999          |
| c-Src-CA vs. c-Src-DN            | **      | 0.0051           |

Fig. 2B. 2D FA size

|                                         |        |
|-----------------------------------------|--------|
| <b>Kruskal-Wallis test</b>              |        |
| P value                                 | 0.0020 |
| Exact or approximate P value?           | Exact  |
| P value summary                         | **     |
| Do the medians vary signif. (P < 0.05)? | Yes    |
| Number of groups                        | 4      |
| Kruskal-Wallis statistic                | 9.359  |

| Dunn's multiple comparisons test | Summary | Adjusted P Value |
|----------------------------------|---------|------------------|
| Ctrl vs. c-Src-WT                | ns      | 0.6775           |
| Ctrl vs. c-Src-CA                | *       | 0.0134           |
| Ctrl vs. c-Src-DN                | ns      | 0.8462           |
| c-Src-WT vs. c-Src-CA            | ns      | 0.8462           |
| c-Src-WT vs. c-Src-DN            | ns      | >0.9999          |
| c-Src-CA vs. c-Src-DN            | ns      | 0.6775           |

Fig. 2C. 2D FA number

|                                         |        |
|-----------------------------------------|--------|
| <b>Kruskal-Wallis test</b>              |        |
| P value                                 | 0.0382 |
| Exact or approximate P value?           | Exact  |
| P value summary                         | *      |
| Do the medians vary signif. (P < 0.05)? | Yes    |
| Number of groups                        | 4      |
| Kruskal-Wallis statistic                | 7.205  |

| Dunn's multiple comparisons test | Summary | Adjusted P Value |
|----------------------------------|---------|------------------|
| Ctrl vs. c-Src-WT                | ns      | >0.9999          |
| Ctrl vs. c-Src-CA                | ns      | 0.0552           |
| Ctrl vs. c-Src-DN                | ns      | >0.9999          |
| c-Src-WT vs. c-Src-CA            | ns      | 0.5366           |
| c-Src-WT vs. c-Src-DN            | ns      | >0.9999          |
| c-Src-CA vs. c-Src-DN            | ns      | 0.4202           |

Fig. 2D. 2D FA density

|                                         |        |
|-----------------------------------------|--------|
| <b>Kruskal-Wallis test</b>              |        |
| P value                                 | 0.0028 |
| Exact or approximate P value?           | Exact  |
| P value summary                         | **     |
| Do the medians vary signif. (P < 0.05)? | Yes    |
| Number of groups                        | 4      |
| Kruskal-Wallis statistic                | 9.154  |

| Dunn's multiple comparisons test | Summary | Adjusted P Value |
|----------------------------------|---------|------------------|
| Ctrl vs. c-Src-WT                | ns      | 0.5366           |
| Ctrl vs. c-Src-CA                | *       | 0.0194           |



|                       |    |         |
|-----------------------|----|---------|
| Ctrl vs. c-Src-DN     | ns | >0.9999 |
| c-Src-WT vs. c-Src-CA | ns | >0.9999 |
| c-Src-WT vs. c-Src-DN | ns | >0.9999 |
| c-Src-CA vs. c-Src-DN | ns | 0.3255  |

**Fig. 2F. 3D FA size**

|                                         |        |
|-----------------------------------------|--------|
| <b>Kruskal-Wallis test</b>              |        |
| P value                                 | 0.0008 |
| Exact or approximate P value?           | Exact  |
| P value summary                         | ***    |
| Do the medians vary signif. (P < 0.05)? | Yes    |
| Number of groups                        | 4      |
| Kruskal-Wallis statistic                | 9.513  |

| Dunn's multiple comparisons test | Summary | Adjusted P Value |
|----------------------------------|---------|------------------|
| Ctrl vs. c-Src-WT                | ns      | 0.4202           |
| Ctrl vs. c-Src-CA                | *       | 0.0194           |
| Ctrl vs. c-Src-DN                | ns      | >0.9999          |
| c-Src-WT vs. c-Src-CA            | ns      | >0.9999          |
| c-Src-WT vs. c-Src-DN            | ns      | >0.9999          |
| c-Src-CA vs. c-Src-DN            | ns      | 0.2492           |

**Fig. 2G. 3D FA number**

|                                         |        |
|-----------------------------------------|--------|
| <b>Kruskal-Wallis test</b>              |        |
| P value                                 | 0.0681 |
| Exact or approximate P value?           | Exact  |
| P value summary                         | ns     |
| Do the medians vary signif. (P < 0.05)? | No     |
| Number of groups                        | 4      |
| Kruskal-Wallis statistic                | 6.590  |

| Dunn's multiple comparisons test | Summary | Adjusted P Value |
|----------------------------------|---------|------------------|
| Ctrl vs. c-Src-WT                | ns      | >0.9999          |
| Ctrl vs. c-Src-CA                | ns      | 0.1412           |
| Ctrl vs. c-Src-DN                | ns      | >0.9999          |
| c-Src-WT vs. c-Src-CA            | ns      | >0.9999          |
| c-Src-WT vs. c-Src-DN            | ns      | >0.9999          |
| c-Src-CA vs. c-Src-DN            | ns      | 0.1887           |

**Fig. 2H. 3D FA density**

|                                         |        |
|-----------------------------------------|--------|
| <b>Kruskal-Wallis test</b>              |        |
| P value                                 | 0.0284 |
| Exact or approximate P value?           | Exact  |
| P value summary                         | *      |
| Do the medians vary signif. (P < 0.05)? | Yes    |
| Number of groups                        | 4      |
| Kruskal-Wallis statistic                | 7.513  |

| Dunn's multiple comparisons test | Summary | Adjusted P Value |
|----------------------------------|---------|------------------|
| Ctrl vs. c-Src-WT                | ns      | >0.9999          |
| Ctrl vs. c-Src-CA                | ns      | 0.0552           |
| Ctrl vs. c-Src-DN                | ns      | >0.9999          |
| c-Src-WT vs. c-Src-CA            | ns      | 0.8462           |
| c-Src-WT vs. c-Src-DN            | ns      | >0.9999          |
| c-Src-CA vs. c-Src-DN            | ns      | 0.2492           |

**Fig. 3B. pVEGFR2 Y951**

| <b>Two-way ANOVA</b> |                      | Ordinary |                 |
|----------------------|----------------------|----------|-----------------|
| Alpha                |                      | 0.05     |                 |
| Source of Variation  | % of total variation | P value  | P value summary |
| Interaction          | 26.54                | 0.0145   | *               |
| Row Factor           | 27.96                | 0.0005   | ***             |
| Column Factor        | 14.20                | 0.0273   | *               |

| <b>Tukey's multiple comparisons test</b> | <b>Summary</b> | <b>Adjusted P Value</b> |
|------------------------------------------|----------------|-------------------------|
| 0                                        |                |                         |
| Ctrl vs. c-Src-WT                        | ns             | >0.9999                 |
| Ctrl vs. c-Src-CA                        | ns             | >0.9999                 |
| Ctrl vs. c-Src-DN                        | ns             | >0.9999                 |
| c-Src-WT vs. c-Src-CA                    | ns             | >0.9999                 |
| c-Src-WT vs. c-Src-DN                    | ns             | >0.9999                 |
| c-Src-CA vs. c-Src-DN                    | ns             | >0.9999                 |
| 5                                        |                |                         |
| Ctrl vs. c-Src-WT                        | ***            | 0.0004                  |
| Ctrl vs. c-Src-CA                        | *              | 0.0200                  |
| Ctrl vs. c-Src-DN                        | ***            | 0.0003                  |
| c-Src-WT vs. c-Src-CA                    | ns             | 0.3688                  |
| c-Src-WT vs. c-Src-DN                    | ns             | >0.9999                 |
| c-Src-CA vs. c-Src-DN                    | ns             | 0.3640                  |
| 15                                       |                |                         |
| Ctrl vs. c-Src-WT                        | ns             | 0.9993                  |
| Ctrl vs. c-Src-CA                        | ns             | 0.9984                  |
| Ctrl vs. c-Src-DN                        | ns             | 0.9997                  |
| c-Src-WT vs. c-Src-CA                    | ns             | 0.9913                  |
| c-Src-WT vs. c-Src-DN                    | ns             | >0.9999                 |
| c-Src-CA vs. c-Src-DN                    | ns             | 0.9938                  |
| Ctrl                                     |                |                         |
| 0 vs. 5                                  | ****           | <0.0001                 |
| 0 vs. 15                                 | ns             | 0.9805                  |
| 5 vs. 15                                 | ****           | <0.0001                 |
| c-Src-WT                                 |                |                         |
| 0 vs. 5                                  | ns             | 0.8874                  |
| 0 vs. 15                                 | ns             | 0.9984                  |
| 5 vs. 15                                 | ns             | 0.9109                  |
| c-Src-CA                                 |                |                         |
| 0 vs. 5                                  | ns             | 0.1122                  |
| 0 vs. 15                                 | ns             | 0.9461                  |
| 5 vs. 15                                 | ns             | 0.1985                  |
| c-Src-DN                                 |                |                         |
| 0 vs. 5                                  | ns             | 0.8891                  |
| 0 vs. 15                                 | ns             | 0.9954                  |
| 5 vs. 15                                 | ns             | 0.9268                  |

**Fig. 3C. pVE-cadherin Y658**

| <b>Two-way ANOVA</b> |                      | Ordinary |                 |
|----------------------|----------------------|----------|-----------------|
| Alpha                |                      | 0.05     |                 |
| Source of Variation  | % of total variation | P value  | P value summary |
| Interaction          | 0.6348               | 0.9361   | ns              |
| Row Factor           | 0.09516              | 0.8768   | ns              |
| Column Factor        | 86.29                | <0.0001  | ****            |

| Tukey's multiple comparisons test | Summary | Adjusted P Value |
|-----------------------------------|---------|------------------|
| 0                                 |         |                  |
| Ctrl vs. c-Src-WT                 | ns      | 0.9649           |
| Ctrl vs. c-Src-CA                 | ****    | <0.0001          |
| Ctrl vs. c-Src-DN                 | ns      | 0.9158           |
| c-Src-WT vs. c-Src-CA             | ****    | <0.0001          |
| c-Src-WT vs. c-Src-DN             | ns      | 0.9980           |
| c-Src-CA vs. c-Src-DN             | ****    | <0.0001          |
| 5                                 |         |                  |
| Ctrl vs. c-Src-WT                 | ns      | 0.9774           |
| Ctrl vs. c-Src-CA                 | ****    | <0.0001          |
| Ctrl vs. c-Src-DN                 | ns      | 0.9999           |
| c-Src-WT vs. c-Src-CA             | ****    | <0.0001          |
| c-Src-WT vs. c-Src-DN             | ns      | 0.9866           |
| c-Src-CA vs. c-Src-DN             | ****    | <0.0001          |
| 15                                |         |                  |
| Ctrl vs. c-Src-WT                 | ns      | 0.9638           |
| Ctrl vs. c-Src-CA                 | ****    | <0.0001          |
| Ctrl vs. c-Src-DN                 | ns      | 0.9954           |
| c-Src-WT vs. c-Src-CA             | ****    | <0.0001          |
| c-Src-WT vs. c-Src-DN             | ns      | 0.9949           |
| c-Src-CA vs. c-Src-DN             | ****    | <0.0001          |
| Ctrl                              |         |                  |
| 0 vs. 5                           | ns      | 0.9113           |
| 0 vs. 15                          | ns      | 0.9742           |
| 5 vs. 15                          | ns      | 0.9796           |
| c-Src-WT                          |         |                  |
| 0 vs. 5                           | ns      | 0.9371           |
| 0 vs. 15                          | ns      | 0.9730           |
| 5 vs. 15                          | ns      | 0.9920           |
| c-Src-CA                          |         |                  |
| 0 vs. 5                           | ns      | 0.7447           |
| 0 vs. 15                          | ns      | 0.8415           |
| 5 vs. 15                          | ns      | 0.4069           |
| c-Src-DN                          |         |                  |
| 0 vs. 5                           | ns      | 0.9843           |
| 0 vs. 15                          | ns      | 0.9790           |
| 5 vs. 15                          | ns      | 0.9996           |

Fig. 3D. pVE-cadherin Y731

| Two-way ANOVA       | Ordinary             |         |                 |
|---------------------|----------------------|---------|-----------------|
| Alpha               | 0.05                 |         |                 |
| Source of Variation | % of total variation | P value | P value summary |
| Interaction         | 0.7640               | 0.9962  | ns              |
| Row Factor          | 0.2847               | 0.8991  | ns              |
| Column Factor       | 66.99                | <0.0001 | ****            |

| Tukey's multiple comparisons test | Summary | Adjusted P Value |
|-----------------------------------|---------|------------------|
| 0                                 |         |                  |
| Ctrl vs. c-Src-WT                 | ns      | 0.9884           |
| Ctrl vs. c-Src-CA                 | *       | 0.0122           |
| Ctrl vs. c-Src-DN                 | ns      | >0.9999          |
| c-Src-WT vs. c-Src-CA             | *       | 0.0255           |
| c-Src-WT vs. c-Src-DN             | ns      | 0.9880           |
| c-Src-CA vs. c-Src-DN             | *       | 0.0121           |
| 5                                 |         |                  |
| Ctrl vs. c-Src-WT                 | ns      | 0.9705           |



|                       |    |         |
|-----------------------|----|---------|
| Ctrl vs. c-Src-CA     | ** | 0.0038  |
| Ctrl vs. c-Src-DN     | ns | 0.9999  |
| c-Src-WT vs. c-Src-CA | *  | 0.0109  |
| c-Src-WT vs. c-Src-DN | ns | 0.9562  |
| c-Src-CA vs. c-Src-DN | ** | 0.0032  |
| 15                    |    |         |
| Ctrl vs. c-Src-WT     | ns | 0.9482  |
| Ctrl vs. c-Src-CA     | *  | 0.0254  |
| Ctrl vs. c-Src-DN     | ns | 0.9998  |
| c-Src-WT vs. c-Src-CA | ns | 0.0809  |
| c-Src-WT vs. c-Src-DN | ns | 0.9235  |
| c-Src-CA vs. c-Src-DN | *  | 0.0210  |
| Ctrl                  |    |         |
| 0 vs. 5               | ns | 0.9972  |
| 0 vs. 15              | ns | 0.9979  |
| 5 vs. 15              | ns | >0.9999 |
| c-Src-WT              |    |         |
| 0 vs. 5               | ns | 0.9795  |
| 0 vs. 15              | ns | 0.9571  |
| 5 vs. 15              | ns | 0.9957  |
| c-Src-CA              |    |         |
| 0 vs. 5               | ns | 0.8426  |
| 0 vs. 15              | ns | 0.9643  |
| 5 vs. 15              | ns | 0.6966  |
| c-Src-DN              |    |         |
| 0 vs. 5               | ns | >0.9999 |
| 0 vs. 15              | ns | 0.9998  |
| 5 vs. 15              | ns | 0.9996  |

**Fig. 3F. Average velocity**

|                                         |             |
|-----------------------------------------|-------------|
| <b>Kruskal-Wallis test</b>              |             |
| P value                                 | <0.0001     |
| Exact or approximate P value?           | Approximate |
| P value summary                         | ****        |
| Do the medians vary signif. (P < 0.05)? | Yes         |
| Number of groups                        | 4           |
| Kruskal-Wallis statistic                | 25.81       |
| Data summary                            |             |
| Number of treatments (columns)          | 4           |
| Number of values (total)                | 125         |

| <b>Dunn's multiple comparisons test</b> | <b>Summary</b> | <b>Adjusted P Value</b> |
|-----------------------------------------|----------------|-------------------------|
| Ctrl vs. c-Src-WT                       | ns             | 0.1088                  |
| Ctrl vs. c-Src-CA                       | **             | 0.0091                  |
| Ctrl vs. c-Src-DN                       | ns             | >0.9999                 |
| c-Src-WT vs. c-Src-CA                   | ns             | >0.9999                 |
| c-Src-WT vs. c-Src-DN                   | **             | 0.0020                  |
| c-Src-CA vs. c-Src-DN                   | ****           | <0.0001                 |

**Fig. 3G. Total distance**

|                                         |             |
|-----------------------------------------|-------------|
| <b>Kruskal-Wallis test</b>              |             |
| P value                                 | 0.0205      |
| Exact or approximate P value?           | Approximate |
| P value summary                         | *           |
| Do the medians vary signif. (P < 0.05)? | Yes         |

|                          |       |
|--------------------------|-------|
| Number of groups         | 4     |
| Kruskal-Wallis statistic | 9.787 |

| Dunn's multiple comparisons test | Summary | Adjusted P Value |
|----------------------------------|---------|------------------|
| Ctrl vs. c-Src-WT                | ns      | >0.9999          |
| Ctrl vs. c-Src-CA                | *       | 0.0402           |
| Ctrl vs. c-Src-DN                | ns      | >0.9999          |
| c-Src-WT vs. c-Src-CA            | ns      | 0.6172           |
| c-Src-WT vs. c-Src-DN            | ns      | >0.9999          |
| c-Src-CA vs. c-Src-DN            | ns      | 0.0619           |

Fig. 4B. Fibronectin fibrils

| Kruskal-Wallis test                     |             |
|-----------------------------------------|-------------|
| P value                                 | <0.0001     |
| Exact or approximate P value?           | Approximate |
| P value summary                         | ****        |
| Do the medians vary signif. (P < 0.05)? | Yes         |
| Number of groups                        | 4           |
| Kruskal-Wallis statistic                | 25.33       |

| Dunn's multiple comparisons test | Summary | Adjusted P Value |
|----------------------------------|---------|------------------|
| Ctrl vs. c-Src-WT                | ns      | >0.9999          |
| Ctrl vs. c-Src-CA                | ***     | 0.0002           |
| Ctrl vs. c-Src-DN                | ns      | >0.9999          |
| c-Src-WT vs. c-Src-CA            | ***     | 0.0002           |
| c-Src-WT vs. c-Src-DN            | ns      | >0.9999          |
| c-Src-CA vs. c-Src-DN            | ***     | 0.0004           |

Fig. 5B. Fibronectin fibrils

| Kruskal-Wallis test                     |             |
|-----------------------------------------|-------------|
| P value                                 | 0.2494      |
| Exact or approximate P value?           | Approximate |
| P value summary                         | ns          |
| Do the medians vary signif. (P < 0.05)? | No          |
| Number of groups                        | 4           |
| Kruskal-Wallis statistic                | 4.114       |

| Dunn's multiple comparisons test | Summary | Adjusted P Value |
|----------------------------------|---------|------------------|
| Ctrl vs. c-Src-WT                | ns      | >0.9999          |
| Ctrl vs. c-Src-CA                | ns      | >0.9999          |
| Ctrl vs. c-Src-DN                | ns      | 0.3850           |
| c-Src-WT vs. c-Src-CA            | ns      | >0.9999          |
| c-Src-WT vs. c-Src-DN            | ns      | 0.5923           |
| c-Src-CA vs. c-Src-DN            | ns      | >0.9999          |

Fig. 5D. Outgrowth composition

| Two-way ANOVA       |                      |         |                 |
|---------------------|----------------------|---------|-----------------|
| Alpha               | Ordinary             |         |                 |
|                     | 0.05                 |         |                 |
| Source of Variation | % of total variation | P value | P value summary |
| Interaction         | 77.16                | <0.0001 | ****            |
| Row Factor          | 0.3954               | 0.0220  | *               |
| Column Factor       | 18.03                | <0.0001 | ****            |

| Tukey's multiple comparisons test | Summary | Adjusted P Value |
|-----------------------------------|---------|------------------|
| EV                                |         |                  |
| Sprout vs. Balloon                | ****    | <0.0001          |
| Src WT                            |         |                  |
| Sprout vs. Balloon                | ****    | <0.0001          |
| Src-CA                            |         |                  |
| Sprout vs. Balloon                | ****    | <0.0001          |
| Src DN                            |         |                  |
| Sprout vs. Balloon                | ****    | <0.0001          |
| Sprout                            |         |                  |
| EV vs. Src WT                     | *       | 0.0156           |
| EV vs. Src-CA                     | ****    | <0.0001          |
| EV vs. Src DN                     | ns      | 0.4411           |
| Src WT vs. Src-CA                 | ****    | <0.0001          |
| Src WT vs. Src DN                 | ns      | 0.5056           |
| Src-CA vs. Src DN                 | ****    | <0.0001          |
| Balloon                           |         |                  |
| EV vs. Src WT                     | ns      | >0.9999          |
| EV vs. Src-CA                     | ****    | <0.0001          |
| EV vs. Src DN                     | ns      | >0.9999          |
| Src WT vs. Src-CA                 | ****    | <0.0001          |
| Src WT vs. Src DN                 | ns      | >0.9999          |
| Src-CA vs. Src DN                 | ****    | <0.0001          |

Fig. 6B. Vascular area with marimastat

| Two-way ANOVA       | Ordinary             |         |                 |
|---------------------|----------------------|---------|-----------------|
| Alpha               | 0.05                 |         |                 |
| Source of Variation | % of total variation | P value | P value summary |
| Interaction         | 18.90                | <0.0001 | ****            |
| Row Factor          | 57.34                | <0.0001 | ****            |
| Column Factor       | 8.371                | <0.0001 | ****            |

| Tukey's multiple comparisons test | Summary | Adjusted P Value |
|-----------------------------------|---------|------------------|
| Ctrl                              |         |                  |
| DMSO vs. Marimastat               | ns      | 0.6643           |
| c-Src-WT                          |         |                  |
| DMSO vs. Marimastat               | ns      | 0.4461           |
| c-Src-CA                          |         |                  |
| DMSO vs. Marimastat               | ****    | <0.0001          |
| c-Src-DN                          |         |                  |
| DMSO vs. Marimastat               | ns      | 0.9476           |
| DMSO                              |         |                  |
| Ctrl vs. c-Src-WT                 | ns      | 0.9976           |
| Ctrl vs. c-Src-CA                 | ****    | <0.0001          |
| Ctrl vs. c-Src-DN                 | ns      | 0.9699           |
| c-Src-WT vs. c-Src-CA             | ****    | <0.0001          |
| c-Src-WT vs. c-Src-DN             | ns      | 0.9137           |
| c-Src-CA vs. c-Src-DN             | ****    | <0.0001          |
| Marimastat                        |         |                  |
| Ctrl vs. c-Src-WT                 | ns      | 0.9998           |
| Ctrl vs. c-Src-CA                 | ****    | <0.0001          |
| Ctrl vs. c-Src-DN                 | ns      | 0.9995           |
| c-Src-WT vs. c-Src-CA             | ****    | <0.0001          |
| c-Src-WT vs. c-Src-DN             | ns      | >0.9999          |
| c-Src-CA vs. c-Src-DN             | ****    | <0.0001          |



**Fig. 6C. Sprout number with marimastat**

| <b>Two-way ANOVA</b> |                      | Ordinary |                 |  |
|----------------------|----------------------|----------|-----------------|--|
| Alpha                |                      | 0.05     |                 |  |
| Source of Variation  | % of total variation | P value  | P value summary |  |
| Interaction          | 17.04                | <0.0001  | ****            |  |
| Row Factor           | 32.37                | <0.0001  | ****            |  |
| Column Factor        | 13.47                | <0.0001  | ****            |  |

| <b>Tukey's multiple comparisons test</b> | <b>Summary</b> | <b>Adjusted P Value</b> |
|------------------------------------------|----------------|-------------------------|
| Ctrl                                     |                |                         |
| DMSO vs. Marimastat                      | ***            | 0.0003                  |
| c-Src-WT                                 |                |                         |
| DMSO vs. Marimastat                      | ****           | <0.0001                 |
| c-Src-CA                                 |                |                         |
| DMSO vs. Marimastat                      | ns             | 0.8389                  |
| c-Src-DN                                 |                |                         |
| DMSO vs. Marimastat                      | ns             | 0.4144                  |
| DMSO                                     |                |                         |
| Ctrl vs. c-Src-WT                        | ***            | 0.0006                  |
| Ctrl vs. c-Src-CA                        | ****           | <0.0001                 |
| Ctrl vs. c-Src-DN                        | ****           | <0.0001                 |
| c-Src-WT vs. c-Src-CA                    | ****           | <0.0001                 |
| c-Src-WT vs. c-Src-DN                    | ****           | <0.0001                 |
| c-Src-CA vs. c-Src-DN                    | ns             | 0.4778                  |
| Marimastat                               |                |                         |
| Ctrl vs. c-Src-WT                        | ns             | 0.0971                  |
| Ctrl vs. c-Src-CA                        | **             | 0.0021                  |
| Ctrl vs. c-Src-DN                        | **             | 0.0082                  |
| c-Src-WT vs. c-Src-CA                    | ns             | 0.4668                  |
| c-Src-WT vs. c-Src-DN                    | ns             | 0.8007                  |
| c-Src-CA vs. c-Src-DN                    | ns             | 0.9298                  |

**Fig. 6D. Vascular area shape with marimastat**

| <b>Two-way ANOVA</b> |                      | Ordinary |                 |  |
|----------------------|----------------------|----------|-----------------|--|
| Alpha                |                      | 0.05     |                 |  |
| Source of Variation  | % of total variation | P value  | P value summary |  |
| Interaction          | 11.68                | <0.0001  | ****            |  |
| Row Factor           | 14.72                | <0.0001  | ****            |  |
| Column Factor        | 21.62                | <0.0001  | ****            |  |

| <b>Tukey's multiple comparisons test</b> | <b>Summary</b> | <b>Adjusted P Value</b> |
|------------------------------------------|----------------|-------------------------|
| Ctrl                                     |                |                         |
| DMSO vs. Marimastat                      | ****           | <0.0001                 |
| c-Src-WT                                 |                |                         |
| DMSO vs. Marimastat                      | ****           | <0.0001                 |
| c-Src-CA                                 |                |                         |
| DMSO vs. Marimastat                      | ns             | 0.7357                  |
| c-Src-DN                                 |                |                         |
| DMSO vs. Marimastat                      | **             | 0.0076                  |
| DMSO                                     |                |                         |
| Ctrl vs. c-Src-WT                        | ns             | 0.3028                  |
| Ctrl vs. c-Src-CA                        | *              | 0.0369                  |
| Ctrl vs. c-Src-DN                        | ****           | <0.0001                 |
| c-Src-WT vs. c-Src-CA                    | ****           | <0.0001                 |
| c-Src-WT vs. c-Src-DN                    | ****           | <0.0001                 |

|                       |      |         |
|-----------------------|------|---------|
| c-Src-CA vs. c-Src-DN | ns   | 0.0928  |
| Marimastat            |      |         |
| Ctrl vs. c-Src-WT     | ns   | 0.2963  |
| Ctrl vs. c-Src-CA     | ns   | 0.1677  |
| Ctrl vs. c-Src-DN     | *    | 0.0151  |
| c-Src-WT vs. c-Src-CA | ***  | 0.0008  |
| c-Src-WT vs. c-Src-DN | ns   | 0.5577  |
| c-Src-CA vs. c-Src-DN | **** | <0.0001 |

Fig. 7B. Vessel width with marimastat

| Two-way ANOVA       | Ordinary             |         |                 |
|---------------------|----------------------|---------|-----------------|
| Alpha               | 0.05                 |         |                 |
| Source of Variation | % of total variation | P value | P value summary |
| Interaction         | 24.77                | <0.0001 | ****            |
| Row Factor          | 59.11                | <0.0001 | ****            |
| Column Factor       | 15.17                | <0.0001 | ****            |

| Tukey's multiple comparisons test | Summary | Adjusted P Value |
|-----------------------------------|---------|------------------|
| Ctrl                              |         |                  |
| DMSO vs. Marimastat               | ns      | 0.5364           |
| c-Src-WT                          |         |                  |
| DMSO vs. Marimastat               | **      | 0.0072           |
| c-Src-CA                          |         |                  |
| DMSO vs. Marimastat               | ****    | <0.0001          |
| c-Src-DN                          |         |                  |
| DMSO vs. Marimastat               | *       | 0.0112           |
| DMSO                              |         |                  |
| Ctrl vs. c-Src-WT                 | ns      | 0.7077           |
| Ctrl vs. c-Src-CA                 | ****    | <0.0001          |
| Ctrl vs. c-Src-DN                 | ns      | 0.9940           |
| c-Src-WT vs. c-Src-CA             | ****    | <0.0001          |
| c-Src-WT vs. c-Src-DN             | ns      | 0.8415           |
| c-Src-CA vs. c-Src-DN             | ****    | <0.0001          |
| Marimastat                        |         |                  |
| Ctrl vs. c-Src-WT                 | **      | 0.0091           |
| Ctrl vs. c-Src-CA                 | **      | 0.0020           |
| Ctrl vs. c-Src-DN                 | ns      | 0.0817           |
| c-Src-WT vs. c-Src-CA             | ****    | <0.0001          |
| c-Src-WT vs. c-Src-DN             | ns      | 0.9733           |
| c-Src-CA vs. c-Src-DN             | ****    | <0.0001          |

Fig. 7C. cell number/vessel with marimastat

| Two-way ANOVA       | Ordinary             |         |                 |
|---------------------|----------------------|---------|-----------------|
| Alpha               | 0.05                 |         |                 |
| Source of Variation | % of total variation | P value | P value summary |
| Interaction         | 6.478                | 0.4437  | ns              |
| Row Factor          | 40.67                | 0.0043  | **              |
| Column Factor       | 1.123                | 0.4944  | ns              |

| Tukey's multiple comparisons test | Summary | Adjusted P Value |
|-----------------------------------|---------|------------------|
| Ctrl                              |         |                  |
| DMSO vs. Marimastat               | ns      | 0.7606           |
| c-Src-WT                          |         |                  |
| DMSO vs. Marimastat               | ns      | 0.9152           |
| c-Src-CA                          |         |                  |
| DMSO vs. Marimastat               | ns      | 0.0855           |

|                       |    |        |
|-----------------------|----|--------|
| c-Src-DN              |    |        |
| DMSO vs. Marimastat   | ns | 0.9483 |
| DMSO                  |    |        |
| Ctrl vs. c-Src-WT     | ns | 0.9003 |
| Ctrl vs. c-Src-CA     | *  | 0.0279 |
| Ctrl vs. c-Src-DN     | ns | 0.9973 |
| c-Src-WT vs. c-Src-CA | ** | 0.0058 |
| c-Src-WT vs. c-Src-DN | ns | 0.9595 |
| c-Src-CA vs. c-Src-DN | *  | 0.0181 |
| Marimastat            |    |        |
| Ctrl vs. c-Src-WT     | ns | 0.8465 |
| Ctrl vs. c-Src-CA     | ns | 0.7833 |
| Ctrl vs. c-Src-DN     | ns | 0.9506 |
| c-Src-WT vs. c-Src-CA | ns | 0.3541 |
| c-Src-WT vs. c-Src-DN | ns | 0.9932 |
| c-Src-CA vs. c-Src-DN | ns | 0.5111 |

Fig. 7D. Vessel edge irregularity with marimastat

| Two-way ANOVA       |                      | Ordinary |         |                 |
|---------------------|----------------------|----------|---------|-----------------|
| Alpha               |                      | 0.05     |         |                 |
| Source of Variation | % of total variation |          | P value | P value summary |
| Interaction         | 2.023                |          | 0.7538  | ns              |
| Row Factor          | 1.195                |          | 0.8709  | ns              |
| Column Factor       | 0.4434               |          | 0.6102  | ns              |

| Tukey's multiple comparisons test | Summary | Adjusted P Value |
|-----------------------------------|---------|------------------|
| Ctrl                              |         |                  |
| DMSO vs. Marimastat               | ns      | 0.2443           |
| c-Src-WT                          |         |                  |
| DMSO vs. Marimastat               | ns      | 0.9675           |
| c-Src-CA                          |         |                  |
| DMSO vs. Marimastat               | ns      | 0.9350           |
| c-Src-DN                          |         |                  |
| DMSO vs. Marimastat               | ns      | 0.8308           |
| DMSO                              |         |                  |
| Ctrl vs. c-Src-WT                 | ns      | 0.9956           |
| Ctrl vs. c-Src-CA                 | ns      | 0.9966           |
| Ctrl vs. c-Src-DN                 | ns      | 0.8544           |
| c-Src-WT vs. c-Src-CA             | ns      | >0.9999          |
| c-Src-WT vs. c-Src-DN             | ns      | 0.9296           |
| c-Src-CA vs. c-Src-DN             | ns      | 0.9390           |
| Marimastat                        |         |                  |
| Ctrl vs. c-Src-WT                 | ns      | 0.7381           |
| Ctrl vs. c-Src-CA                 | ns      | 0.8044           |
| Ctrl vs. c-Src-DN                 | ns      | 0.9298           |
| c-Src-WT vs. c-Src-CA             | ns      | 0.9994           |
| c-Src-WT vs. c-Src-DN             | ns      | 0.9776           |
| c-Src-CA vs. c-Src-DN             | ns      | 0.9917           |

Fig. 7E. Cell size with marimastat

| Two-way ANOVA       |                      | Ordinary |         |                 |
|---------------------|----------------------|----------|---------|-----------------|
| Alpha               |                      | 0.05     |         |                 |
| Source of Variation | % of total variation |          | P value | P value summary |
| Interaction         | 2.876                |          | 0.0127  | *               |
| Row Factor          | 7.550                |          | <0.0001 | ****            |
| Column Factor       | 3.098                |          | 0.0007  | ***             |

| Tukey's multiple comparisons test | Summary | Adjusted P Value |
|-----------------------------------|---------|------------------|
| Ctrl                              |         |                  |
| DMSO vs. Marimastat               | *       | 0.0283           |
| c-Src-WT                          |         |                  |
| DMSO vs. Marimastat               | ns      | 0.7533           |
| c-Src-CA                          |         |                  |
| DMSO vs. Marimastat               | ns      | 0.3786           |
| c-Src-DN                          |         |                  |
| DMSO vs. Marimastat               | ****    | <0.0001          |
| DMSO                              |         |                  |
| Ctrl vs. c-Src-WT                 | *       | 0.0107           |
| Ctrl vs. c-Src-CA                 | ns      | 0.9715           |
| Ctrl vs. c-Src-DN                 | *       | 0.0451           |
| c-Src-WT vs. c-Src-CA             | **      | 0.0011           |
| c-Src-WT vs. c-Src-DN             | ****    | <0.0001          |
| c-Src-CA vs. c-Src-DN             | ns      | 0.0881           |
| Marimastat                        |         |                  |
| Ctrl vs. c-Src-WT                 | ns      | 0.9523           |
| Ctrl vs. c-Src-CA                 | ns      | 0.2769           |
| Ctrl vs. c-Src-DN                 | ns      | 0.8759           |
| c-Src-WT vs. c-Src-CA             | ns      | 0.0924           |
| c-Src-WT vs. c-Src-DN             | ns      | 0.5661           |
| c-Src-CA vs. c-Src-DN             | ns      | 0.6974           |

Fig. 7F. Cell shape with marimastat

| Two-way ANOVA       | Ordinary             |         |                 |
|---------------------|----------------------|---------|-----------------|
| Alpha               | 0.05                 |         |                 |
| Source of Variation | % of total variation | P value | P value summary |
| Interaction         | 0.8390               | 0.2688  | ns              |
| Row Factor          | 27.32                | <0.0001 | ****            |
| Column Factor       | 0.6291               | 0.0862  | ns              |

| Tukey's multiple comparisons test | Summary | Adjusted P Value |
|-----------------------------------|---------|------------------|
| Ctrl                              |         |                  |
| DMSO vs. Marimastat               | ns      | 0.6412           |
| c-Src-WT                          |         |                  |
| DMSO vs. Marimastat               | ns      | 0.1323           |
| c-Src-CA                          |         |                  |
| DMSO vs. Marimastat               | *       | 0.0338           |
| c-Src-DN                          |         |                  |
| DMSO vs. Marimastat               | ns      | 0.7351           |
| DMSO                              |         |                  |
| Ctrl vs. c-Src-WT                 | ns      | 0.2919           |
| Ctrl vs. c-Src-CA                 | ****    | <0.0001          |
| Ctrl vs. c-Src-DN                 | *       | 0.0186           |
| c-Src-WT vs. c-Src-CA             | ****    | <0.0001          |
| c-Src-WT vs. c-Src-DN             | ns      | 0.6891           |
| c-Src-CA vs. c-Src-DN             | ****    | <0.0001          |
| Marimastat                        |         |                  |
| Ctrl vs. c-Src-WT                 | ns      | 0.9951           |
| Ctrl vs. c-Src-CA                 | ****    | <0.0001          |
| Ctrl vs. c-Src-DN                 | ns      | 0.1861           |
| c-Src-WT vs. c-Src-CA             | ****    | <0.0001          |
| c-Src-WT vs. c-Src-DN             | ns      | 0.1101           |
| c-Src-CA vs. c-Src-DN             | ***     | 0.0009           |



**Fig. 7G. Vessel coverage with marimastat**

| <b>Two-way ANOVA</b> |                      | Ordinary |                 |
|----------------------|----------------------|----------|-----------------|
| Alpha                |                      | 0.05     |                 |
| Source of Variation  | % of total variation | P value  | P value summary |
| Interaction          | 24.17                | <0.0001  | ****            |
| Row Factor           | 23.83                | <0.0001  | ****            |
| Column Factor        | 27.58                | <0.0001  | ****            |

| <b>Tukey's multiple comparisons test</b> | <b>Summary</b> | <b>Adjusted P Value</b> |
|------------------------------------------|----------------|-------------------------|
| Ctrl                                     |                |                         |
| DMSO vs. Marimastat                      | ns             | 0.4150                  |
| c-Src-WT                                 |                |                         |
| DMSO vs. Marimastat                      | ns             | 0.0759                  |
| c-Src-CA                                 |                |                         |
| DMSO vs. Marimastat                      | ****           | <0.0001                 |
| c-Src-DN                                 |                |                         |
| DMSO vs. Marimastat                      | *              | 0.0124                  |
| DMSO                                     |                |                         |
| Ctrl vs. c-Src-WT                        | ns             | 0.6468                  |
| Ctrl vs. c-Src-CA                        | ****           | <0.0001                 |
| Ctrl vs. c-Src-DN                        | ns             | 0.3565                  |
| c-Src-WT vs. c-Src-CA                    | ****           | <0.0001                 |
| c-Src-WT vs. c-Src-DN                    | ns             | 0.9761                  |
| c-Src-CA vs. c-Src-DN                    | ****           | <0.0001                 |
| Marimastat                               |                |                         |
| Ctrl vs. c-Src-WT                        | ns             | 0.9892                  |
| Ctrl vs. c-Src-CA                        | ns             | >0.9999                 |
| Ctrl vs. c-Src-DN                        | ns             | >0.9999                 |
| c-Src-WT vs. c-Src-CA                    | ns             | 0.9949                  |
| c-Src-WT vs. c-Src-DN                    | ns             | 0.9877                  |
| c-Src-CA vs. c-Src-DN                    | ns             | 0.9999                  |

**Fig. S1E. c-Src expression level**

| <b>Kruskal-Wallis test</b>              |             |
|-----------------------------------------|-------------|
| P value                                 | 0.0056      |
| Exact or approximate P value?           | Approximate |
| P value summary                         | **          |
| Do the medians vary signif. (P < 0.05)? | Yes         |
| Number of groups                        | 4           |
| Kruskal-Wallis statistic                | 12.61       |

| <b>Dunn's multiple comparisons test</b> | <b>Summary</b> | <b>Adjusted P Value</b> |
|-----------------------------------------|----------------|-------------------------|
| Ctrl vs. c-Src-WT                       | **             | 0.0057                  |
| Ctrl vs. c-Src-CA                       | ns             | 0.1335                  |
| Ctrl vs. c-Src-DN                       | *              | 0.0374                  |
| c-Src-WT vs. c-Src-CA                   | ns             | >0.9999                 |
| c-Src-WT vs. c-Src-DN                   | ns             | >0.9999                 |
| c-Src-CA vs. c-Src-DN                   | ns             | >0.9999                 |

**Fig. S1G. DLL4 expression level**

| <b>Kruskal-Wallis test</b>    |        |
|-------------------------------|--------|
| P value                       | 0.5386 |
| Exact or approximate P value? | Exact  |

|                                         |       |
|-----------------------------------------|-------|
| P value summary                         | ns    |
| Do the medians vary signif. (P < 0.05)? | No    |
| Number of groups                        | 4     |
| Kruskal-Wallis statistic                | 2.385 |

| Dunn's multiple comparisons test | Summary | Adjusted P Value |
|----------------------------------|---------|------------------|
| Ctrl vs. c-Src-WT                | ns      | >0.9999          |
| Ctrl vs. c-Src-CA                | ns      | 0.8462           |
| Ctrl vs. c-Src-DN                | ns      | >0.9999          |
| c-Src-WT vs. c-Src-CA            | ns      | >0.9999          |
| c-Src-WT vs. c-Src-DN            | ns      | >0.9999          |
| c-Src-CA vs. c-Src-DN            | ns      | >0.9999          |

**Fig. S1I. Vessel width (y-axis)**

| Kruskal-Wallis test                     |             |
|-----------------------------------------|-------------|
| P value                                 | 0.0060      |
| Exact or approximate P value?           | Approximate |
| P value summary                         | **          |
| Do the medians vary signif. (P < 0.05)? | Yes         |
| Number of groups                        | 4           |
| Kruskal-Wallis statistic                | 12.45       |

| Dunn's multiple comparisons test | Summary | Adjusted P Value |
|----------------------------------|---------|------------------|
| Ctrl vs. c-Src-WT                | ns      | 0.4220           |
| Ctrl vs. c-Src-CA                | **      | 0.0029           |
| Ctrl vs. c-Src-DN                | ns      | >0.9999          |
| c-Src-WT vs. c-Src-CA            | ns      | 0.5105           |
| c-Src-WT vs. c-Src-DN            | ns      | >0.9999          |
| c-Src-CA vs. c-Src-DN            | ns      | 0.1960           |

**Fig. S1K. Ki-67 Proliferation**

| Kruskal-Wallis test                     |             |
|-----------------------------------------|-------------|
| P value                                 | 0.5630      |
| Exact or approximate P value?           | Approximate |
| P value summary                         | ns          |
| Do the medians vary signif. (P < 0.05)? | No          |
| Number of groups                        | 4           |
| Kruskal-Wallis statistic                | 2.046       |

| Dunn's multiple comparisons test | Summary | Adjusted P Value |
|----------------------------------|---------|------------------|
| Ctrl vs. c-Src-WT                | ns      | >0.9999          |
| Ctrl vs. c-Src-CA                | ns      | >0.9999          |
| Ctrl vs. c-Src-DN                | ns      | >0.9999          |
| c-Src-WT vs. c-Src-CA            | ns      | >0.9999          |
| c-Src-WT vs. c-Src-DN            | ns      | >0.9999          |
| c-Src-CA vs. c-Src-DN            | ns      | >0.9999          |

**Fig. S1M. EdU Proliferation**

| Kruskal-Wallis test                     |             |
|-----------------------------------------|-------------|
| P value                                 | 0.0060      |
| Exact or approximate P value?           | Approximate |
| P value summary                         | ***         |
| Do the medians vary signif. (P < 0.05)? | Yes         |
| Number of groups                        | 4           |
| Kruskal-Wallis statistic                | 17.22       |

| Dunn's multiple comparisons test | Summary | Adjusted P Value |
|----------------------------------|---------|------------------|
| Ctrl vs. c-Src-WT                | ns      | 0.1495           |
| Ctrl vs. c-Src-CA                | **      | 0.0010           |
| Ctrl vs. c-Src-DN                | ns      | >0.9999          |
| c-Src-WT vs. c-Src-CA            | ns      | 0.7770           |
| c-Src-WT vs. c-Src-DN            | ns      | 0.6106           |
| c-Src-CA vs. c-Src-DN            | **      | 0.0097           |

Fig. S2B. Ki-67 Proliferation

| Kruskal-Wallis test                     |        |
|-----------------------------------------|--------|
| P value                                 | 0.9806 |
| Exact or approximate P value?           | Exact  |
| P value summary                         | ns     |
| Do the medians vary signif. (P < 0.05)? | No     |
| Number of groups                        | 4      |
| Kruskal-Wallis statistic                | 0.2078 |

| Dunn's multiple comparisons test | Summary | Adjusted P Value |
|----------------------------------|---------|------------------|
| Ctrl vs. c-Src-WT                | ns      | >0.9999          |
| Ctrl vs. c-Src-CA                | ns      | >0.9999          |
| Ctrl vs. c-Src-DN                | ns      | >0.9999          |
| c-Src-WT vs. c-Src-CA            | ns      | >0.9999          |
| c-Src-WT vs. c-Src-DN            | ns      | >0.9999          |
| c-Src-CA vs. c-Src-DN            | ns      | >0.9999          |

Fig. S2D. EdU Proliferation

| Kruskal-Wallis test                     |        |
|-----------------------------------------|--------|
| P value                                 | 0.1649 |
| Exact or approximate P value?           | Exact  |
| P value summary                         | ns     |
| Do the medians vary signif. (P < 0.05)? | No     |
| Number of groups                        | 4      |
| Kruskal-Wallis statistic                | 5.088  |

| Dunn's multiple comparisons test | Summary | Adjusted P Value |
|----------------------------------|---------|------------------|
| Ctrl vs. c-Src-WT                | ns      | >0.9999          |
| Ctrl vs. c-Src-CA                | ns      | 0.3311           |
| Ctrl vs. c-Src-DN                | ns      | 0.5394           |
| c-Src-WT vs. c-Src-CA            | ns      | 0.9530           |
| c-Src-WT vs. c-Src-DN            | ns      | >0.9999          |
| c-Src-CA vs. c-Src-DN            | ns      | >0.9999          |

Fig. S2F. Cell size

| Kruskal-Wallis test                     |             |
|-----------------------------------------|-------------|
| P value                                 | 0.3356      |
| Exact or approximate P value?           | Approximate |
| P value summary                         | ns          |
| Do the medians vary signif. (P < 0.05)? | No          |
| Number of groups                        | 4           |
| Kruskal-Wallis statistic                | 3.388       |

| Dunn's multiple comparisons test | Summary | Adjusted P Value |
|----------------------------------|---------|------------------|
| Ctrl vs. c-Src-WT                | ns      | >0.9999          |

|                       |    |         |
|-----------------------|----|---------|
| Ctrl vs. c-Src-CA     | ns | 0.7235  |
| Ctrl vs. c-Src-DN     | ns | >0.9999 |
| c-Src-WT vs. c-Src-CA | ns | 0.5556  |
| c-Src-WT vs. c-Src-DN | ns | >0.9999 |
| c-Src-CA vs. c-Src-DN | ns | >0.9999 |

**Fig. S2G. Cell perimeter**

|                                         |             |
|-----------------------------------------|-------------|
| <b>Kruskal-Wallis test</b>              |             |
| P value                                 | 0.0151      |
| Exact or approximate P value?           | Approximate |
| P value summary                         | *           |
| Do the medians vary signif. (P < 0.05)? | Yes         |
| Number of groups                        | 4           |
| Kruskal-Wallis statistic                | 10.44       |

| Dunn's multiple comparisons test | Summary | Adjusted P Value |
|----------------------------------|---------|------------------|
| Ctrl vs. c-Src-WT                | ns      | >0.9999          |
| Ctrl vs. c-Src-CA                | ns      | 0.0698           |
| Ctrl vs. c-Src-DN                | ns      | >0.9999          |
| c-Src-WT vs. c-Src-CA            | **      | 0.0085           |
| c-Src-WT vs. c-Src-DN            | ns      | >0.9999          |
| c-Src-CA vs. c-Src-DN            | ns      | 0.1747           |

**Fig. S2H. Cell Shape**

|                                         |             |
|-----------------------------------------|-------------|
| <b>Kruskal-Wallis test</b>              |             |
| P value                                 | 0.0101      |
| Exact or approximate P value?           | Approximate |
| P value summary                         | *           |
| Do the medians vary signif. (P < 0.05)? | Yes         |
| Number of groups                        | 4           |
| Kruskal-Wallis statistic                | 11.33       |

| Dunn's multiple comparisons test | Summary | Adjusted P Value |
|----------------------------------|---------|------------------|
| Ctrl vs. c-Src-WT                | ns      | 0.1545           |
| Ctrl vs. c-Src-CA                | *       | 0.0191           |
| Ctrl vs. c-Src-DN                | ns      | >0.9999          |
| c-Src-WT vs. c-Src-CA            | ns      | >0.9999          |
| c-Src-WT vs. c-Src-DN            | ns      | 0.7411           |
| c-Src-CA vs. c-Src-DN            | ns      | 0.0955           |

**Fig. S2J. Cleaved Caspase3 Apoptosis**

|                                         |        |
|-----------------------------------------|--------|
| <b>Kruskal-Wallis test</b>              |        |
| P value                                 | 0.1112 |
| Exact or approximate P value?           | Exact  |
| P value summary                         | ns     |
| Do the medians vary signif. (P < 0.05)? | No     |
| Number of groups                        | 4      |
| Kruskal-Wallis statistic                | 5.821  |

| Dunn's multiple comparisons test | Summary | Adjusted P Value |
|----------------------------------|---------|------------------|
| Ctrl vs. c-Src-WT                | ns      | 0.1412           |
| Ctrl vs. c-Src-CA                | ns      | >0.9999          |
| Ctrl vs. c-Src-DN                | ns      | 0.4202           |
| c-Src-WT vs. c-Src-CA            | ns      | >0.9999          |
| c-Src-WT vs. c-Src-DN            | ns      | >0.9999          |



|                       |    |         |
|-----------------------|----|---------|
| c-Src-CA vs. c-Src-DN | ns | >0.9999 |
|-----------------------|----|---------|

**Fig. S3B. p-paxillin Y118**

| <b>Kruskal-Wallis test</b>              |             |
|-----------------------------------------|-------------|
| P value                                 | 0.0027      |
| Exact or approximate P value?           | Approximate |
| P value summary                         | **          |
| Do the medians vary signif. (P < 0.05)? | Yes         |
| Number of groups                        | 4           |
| Kruskal-Wallis statistic                | 14.15       |

| <b>Dunn's multiple comparisons test</b> | <b>Summary</b> | <b>Adjusted P Value</b> |
|-----------------------------------------|----------------|-------------------------|
| Ctrl vs. c-Src-WT                       | ns             | 0.4150                  |
| Ctrl vs. c-Src-CA                       | **             | 0.0031                  |
| Ctrl vs. c-Src-DN                       | ns             | >0.9999                 |
| c-Src-WT vs. c-Src-CA                   | ns             | 0.5851                  |
| c-Src-WT vs. c-Src-DN                   | ns             | >0.9999                 |
| c-Src-CA vs. c-Src-DN                   | *              | 0.0234                  |

**Fig. S3C. pFAK Y576**

| <b>Kruskal-Wallis test</b>              |             |
|-----------------------------------------|-------------|
| P value                                 | 0.0313      |
| Exact or approximate P value?           | Approximate |
| P value summary                         | *           |
| Do the medians vary signif. (P < 0.05)? | Yes         |
| Number of groups                        | 4           |
| Kruskal-Wallis statistic                | 8.851       |

| <b>Dunn's multiple comparisons test</b> | <b>Summary</b> | <b>Adjusted P Value</b> |
|-----------------------------------------|----------------|-------------------------|
| Ctrl vs. c-Src-WT                       | ns             | >0.9999                 |
| Ctrl vs. c-Src-CA                       | *              | 0.0197                  |
| Ctrl vs. c-Src-DN                       | ns             | >0.9999                 |
| c-Src-WT vs. c-Src-CA                   | ns             | 0.4665                  |
| c-Src-WT vs. c-Src-DN                   | ns             | >0.9999                 |
| c-Src-CA vs. c-Src-DN                   | ns             | 0.4150                  |

**Fig. S3E. FA size**

| <b>Kruskal-Wallis test</b>              |             |
|-----------------------------------------|-------------|
| P value                                 | <0.0001     |
| Exact or approximate P value?           | Approximate |
| P value summary                         | ****        |
| Do the medians vary signif. (P < 0.05)? | Yes         |
| Number of groups                        | 4           |
| Kruskal-Wallis statistic                | 27.90       |

| <b>Dunn's multiple comparisons test</b> | <b>Summary</b> | <b>Adjusted P Value</b> |
|-----------------------------------------|----------------|-------------------------|
| Ctrl vs. c-Src-WT                       | ns             | >0.9999                 |
| Ctrl vs. c-Src-CA                       | ****           | <0.0001                 |
| Ctrl vs. c-Src-DN                       | ***            | 0.0007                  |
| c-Src-WT vs. c-Src-CA                   | **             | 0.0071                  |
| c-Src-WT vs. c-Src-DN                   | *              | 0.0369                  |
| c-Src-CA vs. c-Src-DN                   | ns             | >0.9999                 |

**Fig. S3F. FA number**

| <b>Kruskal-Wallis test</b>              |             |
|-----------------------------------------|-------------|
| P value                                 | 0.0078      |
| Exact or approximate P value?           | Approximate |
| P value summary                         | **          |
| Do the medians vary signif. (P < 0.05)? | Yes         |
| Number of groups                        | 4           |
| Kruskal-Wallis statistic                | 11.89       |

| <b>Dunn's multiple comparisons test</b> | <b>Summary</b> | <b>Adjusted P Value</b> |
|-----------------------------------------|----------------|-------------------------|
| Ctrl vs. c-Src-WT                       | ns             | 0.0746                  |
| Ctrl vs. c-Src-CA                       | **             | 0.0097                  |
| Ctrl vs. c-Src-DN                       | ns             | >0.9999                 |
| c-Src-WT vs. c-Src-CA                   | ns             | >0.9999                 |
| c-Src-WT vs. c-Src-DN                   | ns             | >0.9999                 |
| c-Src-CA vs. c-Src-DN                   | ns             | 0.3376                  |

**Fig. S3G. FA density**

| <b>Kruskal-Wallis test</b>              |             |
|-----------------------------------------|-------------|
| P value                                 | 0.0005      |
| Exact or approximate P value?           | Approximate |
| P value summary                         | ***         |
| Do the medians vary signif. (P < 0.05)? | Yes         |
| Number of groups                        | 4           |
| Kruskal-Wallis statistic                | 17.90       |

| <b>Dunn's multiple comparisons test</b> | <b>Summary</b> | <b>Adjusted P Value</b> |
|-----------------------------------------|----------------|-------------------------|
| Ctrl vs. c-Src-WT                       | ns             | 0.5772                  |
| Ctrl vs. c-Src-CA                       | ***            | 0.0008                  |
| Ctrl vs. c-Src-DN                       | ns             | >0.9999                 |
| c-Src-WT vs. c-Src-CA                   | ns             | 0.1588                  |
| c-Src-WT vs. c-Src-DN                   | ns             | 0.8570                  |
| c-Src-CA vs. c-Src-DN                   | **             | 0.0053                  |

**Fig. S4B. Average velocity**

| <b>Kruskal-Wallis test</b>              |             |
|-----------------------------------------|-------------|
| P value                                 | <0.0001     |
| Exact or approximate P value?           | Approximate |
| P value summary                         | ****        |
| Do the medians vary signif. (P < 0.05)? | Yes         |
| Number of groups                        | 4           |
| Kruskal-Wallis statistic                | 57.49       |

| <b>Dunn's multiple comparisons test</b> | <b>Summary</b> | <b>Adjusted P Value</b> |
|-----------------------------------------|----------------|-------------------------|
| Ctrl vs. c-Src-WT                       | ns             | 0.1439                  |
| Ctrl vs. c-Src-CA                       | ****           | <0.0001                 |
| Ctrl vs. c-Src-DN                       | ns             | >0.9999                 |
| c-Src-WT vs. c-Src-CA                   | ****           | <0.0001                 |
| c-Src-WT vs. c-Src-DN                   | ns             | 0.0921                  |
| c-Src-CA vs. c-Src-DN                   | ****           | <0.0001                 |

**Fig. S4C. Total distance**

| <b>Kruskal-Wallis test</b>    |             |
|-------------------------------|-------------|
| P value                       | <0.0001     |
| Exact or approximate P value? | Approximate |

|                                         |       |
|-----------------------------------------|-------|
| P value summary                         | ****  |
| Do the medians vary signif. (P < 0.05)? | Yes   |
| Number of groups                        | 4     |
| Kruskal-Wallis statistic                | 57.88 |

| Dunn's multiple comparisons test | Summary | Adjusted P Value |
|----------------------------------|---------|------------------|
| Ctrl vs. c-Src-WT                | ns      | 0.1288           |
| Ctrl vs. c-Src-CA                | ****    | <0.0001          |
| Ctrl vs. c-Src-DN                | ns      | >0.9999          |
| c-Src-WT vs. c-Src-CA            | ****    | <0.0001          |
| c-Src-WT vs. c-Src-DN            | ns      | 0.0704           |
| c-Src-CA vs. c-Src-DN            | ****    | <0.0001          |

Fig. S5B. Fibronectin fibrils

| Two-way ANOVA       | Ordinary             |         |                 |
|---------------------|----------------------|---------|-----------------|
| Alpha               | 0.05                 |         |                 |
| Source of Variation | % of total variation | P value | P value summary |
| Interaction         | 9.737                | <0.0001 | ****            |
| Row Factor          | 32.09                | <0.0001 | ****            |
| Column Factor       | 23.11                | <0.0001 | ****            |

| Tukey's multiple comparisons test | Summary | Adjusted P Value |
|-----------------------------------|---------|------------------|
| Ctrl                              |         |                  |
| 4Hr vs. 24Hr                      | ****    | <0.0001          |
| 4Hr vs. 48Hr                      | ****    | <0.0001          |
| 24Hr vs. 48Hr                     | **      | 0.0032           |
| c-Src-WT                          |         |                  |
| 4Hr vs. 24Hr                      | ****    | <0.0001          |
| 4Hr vs. 48Hr                      | ****    | <0.0001          |
| 24Hr vs. 48Hr                     | ns      | 0.1625           |
| c-Src-CA                          |         |                  |
| 4Hr vs. 24Hr                      | ns      | 0.8596           |
| 4Hr vs. 48Hr                      | ns      | 0.6106           |
| 24Hr vs. 48Hr                     | ns      | 0.9045           |
| c-Src-DN                          |         |                  |
| 4Hr vs. 24Hr                      | ****    | <0.0001          |
| 4Hr vs. 48Hr                      | ***     | 0.0004           |
| 24Hr vs. 48Hr                     | ns      | 0.5481           |
| 4Hr                               |         |                  |
| Ctrl vs. c-Src-WT                 | **      | 0.0054           |
| Ctrl vs. c-Src-CA                 | *       | 0.0260           |
| Ctrl vs. c-Src-DN                 | **      | 0.0033           |
| c-Src-WT vs. c-Src-CA             | ns      | 0.9414           |
| c-Src-WT vs. c-Src-DN             | ns      | 0.9988           |
| c-Src-CA vs. c-Src-DN             | ns      | 0.8897           |
| 24Hr                              |         |                  |
| Ctrl vs. c-Src-WT                 | ns      | 0.4307           |
| Ctrl vs. c-Src-CA                 | ****    | <0.0001          |
| Ctrl vs. c-Src-DN                 | ***     | 0.0008           |
| c-Src-WT vs. c-Src-CA             | ****    | <0.0001          |
| c-Src-WT vs. c-Src-DN             | ns      | 0.0636           |
| c-Src-CA vs. c-Src-DN             | **      | 0.0020           |
| 48Hr                              |         |                  |
| Ctrl vs. c-Src-WT                 | ****    | <0.0001          |
| Ctrl vs. c-Src-CA                 | ****    | <0.0001          |
| Ctrl vs. c-Src-DN                 | ****    | <0.0001          |

|                       |    |        |
|-----------------------|----|--------|
| c-Src-WT vs. c-Src-CA | ** | 0.0017 |
| c-Src-WT vs. c-Src-DN | ns | 0.3580 |
| c-Src-CA vs. c-Src-DN | ns | 0.1337 |

**Fig. S6B. Fibronectin fibrils**

|                      |                      |         |                 |
|----------------------|----------------------|---------|-----------------|
| <b>Two-way ANOVA</b> | Ordinary             |         |                 |
| Alpha                | 0.05                 |         |                 |
| Source of Variation  | % of total variation | P value | P value summary |
| Interaction          | 6.544                | 0.0472  | *               |
| Row Factor           | 10.81                | 0.0051  | **              |
| Column Factor        | 2.088                | 0.1085  | ns              |

| Tukey's multiple comparisons test | Summary | Adjusted P Value |
|-----------------------------------|---------|------------------|
| Ctrl                              |         |                  |
| DMSO vs. Marimastat               | ns      | 0.1677           |
| c-Src-WT                          |         |                  |
| DMSO vs. Marimastat               | ns      | 0.6641           |
| c-Src-CA                          |         |                  |
| DMSO vs. Marimastat               | ns      | 0.0812           |
| c-Src-DN                          |         |                  |
| DMSO vs. Marimastat               | *       | 0.0269           |
| DMSO                              |         |                  |
| Ctrl vs. c-Src-WT                 | ns      | 0.1209           |
| Ctrl vs. c-Src-CA                 | ***     | 0.0007           |
| Ctrl vs. c-Src-DN                 | *       | 0.0107           |
| c-Src-WT vs. c-Src-CA             | ns      | 0.2381           |
| c-Src-WT vs. c-Src-DN             | ns      | 0.7436           |
| c-Src-CA vs. c-Src-DN             | ns      | 0.8186           |
| Marimastat                        |         |                  |
| Ctrl vs. c-Src-WT                 | ns      | 0.9712           |
| Ctrl vs. c-Src-CA                 | ns      | 0.7164           |
| Ctrl vs. c-Src-DN                 | ns      | 0.9716           |
| c-Src-WT vs. c-Src-CA             | ns      | 0.9268           |
| c-Src-WT vs. c-Src-DN             | ns      | 0.8193           |
| c-Src-CA vs. c-Src-DN             | ns      | 0.4549           |

**Fig. S6C. FA size**

|                      |                      |         |                 |
|----------------------|----------------------|---------|-----------------|
| <b>Two-way ANOVA</b> | Ordinary             |         |                 |
| Alpha                | 0.05                 |         |                 |
| Source of Variation  | % of total variation | P value | P value summary |
| Interaction          | 0.04728              | 0.9414  | ns              |
| Row Factor           | 64.94                | <0.0001 | ****            |
| Column Factor        | 0.2157               | 0.1812  | ns              |

| Tukey's multiple comparisons test | Summary | Adjusted P Value |
|-----------------------------------|---------|------------------|
| Ctrl                              |         |                  |
| DMSO vs. Marimastat               | ns      | 0.2303           |
| c-Src-WT                          |         |                  |
| DMSO vs. Marimastat               | ns      | 0.4557           |
| c-Src-CA                          |         |                  |
| DMSO vs. Marimastat               | ns      | 0.8668           |
| c-Src-DN                          |         |                  |
| DMSO vs. Marimastat               | ns      | 0.4849           |
| DMSO                              |         |                  |
| Ctrl vs. c-Src-WT                 | ns      | >0.9999          |



|                       |      |         |
|-----------------------|------|---------|
| Ctrl vs. c-Src-CA     | **** | <0.0001 |
| Ctrl vs. c-Src-DN     | ns   | 0.8488  |
| c-Src-WT vs. c-Src-CA | **** | <0.0001 |
| c-Src-WT vs. c-Src-DN | ns   | 0.8516  |
| c-Src-CA vs. c-Src-DN | **** | <0.0001 |
| Marimastat            |      |         |
| Ctrl vs. c-Src-WT     | ns   | 0.9684  |
| Ctrl vs. c-Src-CA     | **** | <0.0001 |
| Ctrl vs. c-Src-DN     | ns   | 0.9466  |
| c-Src-WT vs. c-Src-CA | **** | <0.0001 |
| c-Src-WT vs. c-Src-DN | ns   | 0.7384  |
| c-Src-CA vs. c-Src-DN | **** | <0.0001 |

Fig. S6D. FA number

| Two-way ANOVA       | Ordinary             |         |                 |
|---------------------|----------------------|---------|-----------------|
| Alpha               | 0.05                 |         |                 |
| Source of Variation | % of total variation | P value | P value summary |
| Interaction         | 1.653                | 0.0946  | ns              |
| Row Factor          | 22.70                | <0.0001 | ****            |
| Column Factor       | 1.173                | 0.0334  | *               |

| Tukey's multiple comparisons test | Summary | Adjusted P Value |
|-----------------------------------|---------|------------------|
| Ctrl                              |         |                  |
| DMSO vs. Marimastat               | *       | 0.0201           |
| c-Src-WT                          |         |                  |
| DMSO vs. Marimastat               | ns      | 0.7923           |
| c-Src-CA                          |         |                  |
| DMSO vs. Marimastat               | *       | 0.0197           |
| c-Src-DN                          |         |                  |
| DMSO vs. Marimastat               | ns      | 0.5732           |
| DMSO                              |         |                  |
| Ctrl vs. c-Src-WT                 | **      | 0.0036           |
| Ctrl vs. c-Src-CA                 | **      | 0.0022           |
| Ctrl vs. c-Src-DN                 | ns      | 0.3788           |
| c-Src-WT vs. c-Src-CA             | ns      | 0.8872           |
| c-Src-WT vs. c-Src-DN             | ***     | 0.0001           |
| c-Src-CA vs. c-Src-DN             | ****    | <0.0001          |
| Marimastat                        |         |                  |
| Ctrl vs. c-Src-WT                 | ns      | 0.6828           |
| Ctrl vs. c-Src-CA                 | ***     | 0.0002           |
| Ctrl vs. c-Src-DN                 | ****    | <0.0001          |
| c-Src-WT vs. c-Src-CA             | **      | 0.0073           |
| c-Src-WT vs. c-Src-DN             | ****    | <0.0001          |
| c-Src-CA vs. c-Src-DN             | ****    | <0.0001          |

Fig. S6E. FA density

| Two-way ANOVA       | Ordinary             |         |                 |
|---------------------|----------------------|---------|-----------------|
| Alpha               | 0.05                 |         |                 |
| Source of Variation | % of total variation | P value | P value summary |
| Interaction         | 0.1602               | 0.6785  | ns              |
| Row Factor          | 69.23                | <0.0001 | ****            |
| Column Factor       | 0.2635               | 0.1153  | ns              |

| Tukey's multiple comparisons test | Summary | Adjusted P Value |
|-----------------------------------|---------|------------------|
| Ctrl                              |         |                  |
| DMSO vs. Marimastat               | ns      | 0.9614           |

|                       |      |         |
|-----------------------|------|---------|
| c-Src-WT              |      |         |
| DMSO vs. Marimastat   | ns   | 0.1997  |
| c-Src-CA              |      |         |
| DMSO vs. Marimastat   | ns   | 0.1672  |
| c-Src-DN              |      |         |
| DMSO vs. Marimastat   | ns   | 0.6231  |
| DMSO                  |      |         |
| Ctrl vs. c-Src-WT     | ns   | 0.0920  |
| Ctrl vs. c-Src-CA     | **** | <0.0001 |
| Ctrl vs. c-Src-DN     | ns   | 0.5690  |
| c-Src-WT vs. c-Src-CA | **** | <0.0001 |
| c-Src-WT vs. c-Src-DN | *    | 0.0107  |
| c-Src-CA vs. c-Src-DN | **** | <0.0001 |
| Marimastat            |      |         |
| Ctrl vs. c-Src-WT     | ns   | 0.8376  |
| Ctrl vs. c-Src-CA     | **** | <0.0001 |
| Ctrl vs. c-Src-DN     | ns   | 0.2090  |
| c-Src-WT vs. c-Src-CA | **** | <0.0001 |
| c-Src-WT vs. c-Src-DN | *    | 0.0244  |
| c-Src-CA vs. c-Src-DN | **** | <0.0001 |

**Fig. S7B. Vessel width (y-axis)**

|                     |                      |         |                 |
|---------------------|----------------------|---------|-----------------|
| Two-way ANOVA       | Ordinary             |         |                 |
| Alpha               | 0.05                 |         |                 |
| Source of Variation | % of total variation | P value | P value summary |
| Interaction         | 16.49                | 0.0022  | **              |
| Row Factor          | 50.68                | <0.0001 | ****            |
| Column Factor       | 9.551                | 0.0027  | **              |

| Tukey's multiple comparisons test | Summary | Adjusted P Value |
|-----------------------------------|---------|------------------|
| Ctrl                              |         |                  |
| DMSO vs. Marimastat               | ns      | 0.5213           |
| c-Src-WT                          |         |                  |
| DMSO vs. Marimastat               | ns      | 0.6626           |
| c-Src-CA                          |         |                  |
| DMSO vs. Marimastat               | ****    | <0.0001          |
| c-Src-DN                          |         |                  |
| DMSO vs. Marimastat               | ns      | 0.6811           |
| DMSO                              |         |                  |
| Ctrl vs. c-Src-WT                 | ns      | 0.7933           |
| Ctrl vs. c-Src-CA                 | ****    | <0.0001          |
| Ctrl vs. c-Src-DN                 | ns      | 0.9326           |
| c-Src-WT vs. c-Src-CA             | ****    | <0.0001          |
| c-Src-WT vs. c-Src-DN             | ns      | 0.9898           |
| c-Src-CA vs. c-Src-DN             | ****    | <0.0001          |
| Marimastat                        |         |                  |
| Ctrl vs. c-Src-WT                 | ns      | 0.8037           |
| Ctrl vs. c-Src-CA                 | ns      | 0.4743           |
| Ctrl vs. c-Src-DN                 | ns      | 0.9582           |
| c-Src-WT vs. c-Src-CA             | ns      | 0.1220           |
| c-Src-WT vs. c-Src-DN             | ns      | 0.9808           |
| c-Src-CA vs. c-Src-DN             | ns      | 0.2562           |

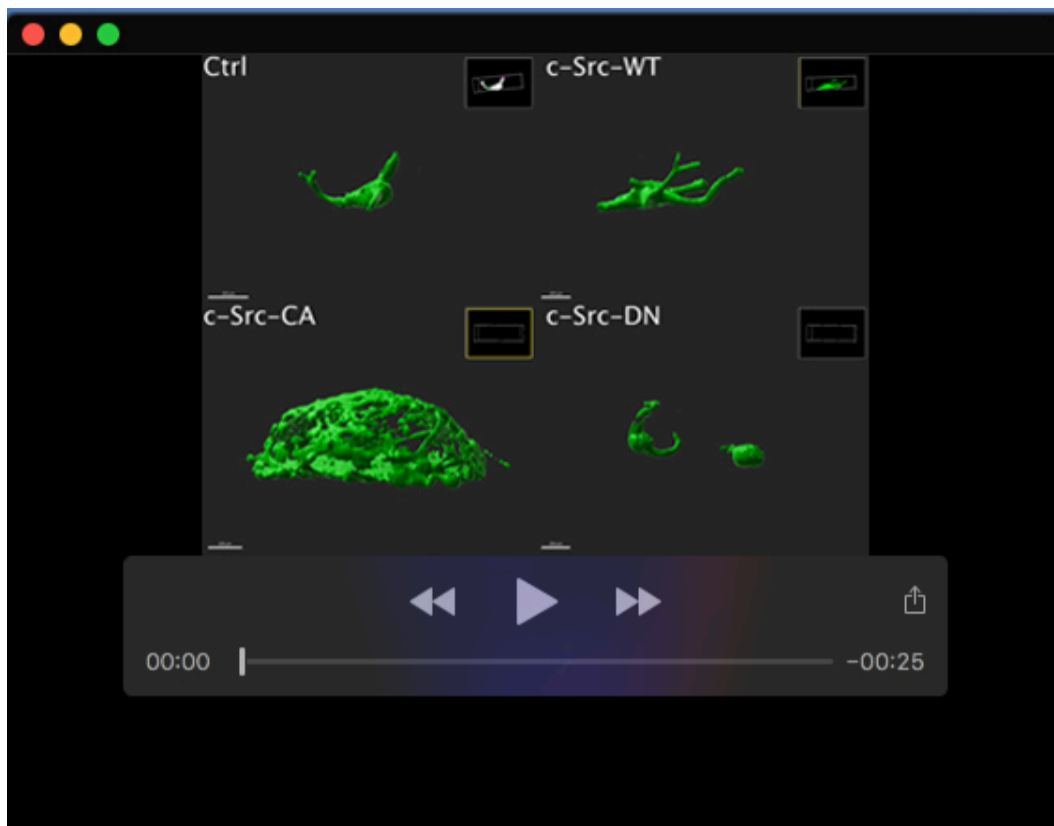

**Movie 1. Constitutively active c-Src induces ballooning vasculature in a bead sprouting assay.** Corresponds to Figure 1A. HUVECs transduced with c-Src-mScarlet mutants were grown in a 5 mg/mL fibrin gel bead sprouting assay for 7 days before fixing. Immunofluorescent staining for F-Actin (Phalloidin) and mScarlet signal were used to 3D render sprouts using Imaris software.

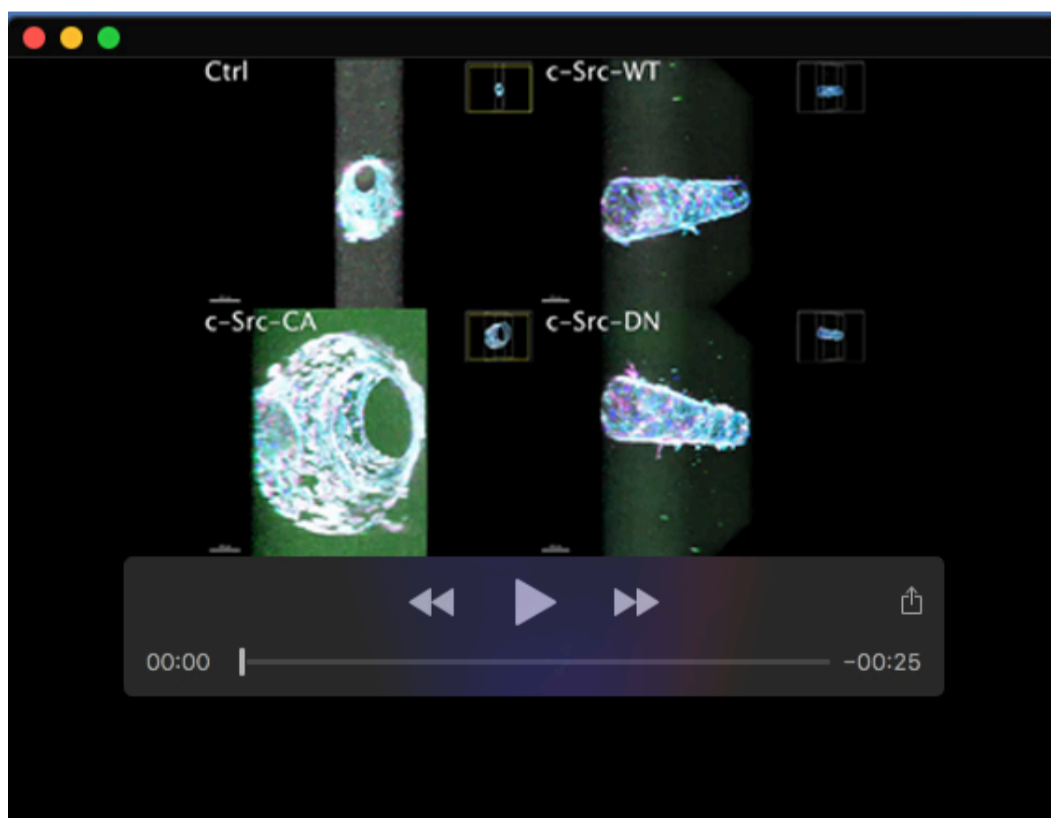

**Movie 2. Constitutively active c-Src induces ballooning vasculature in 3D microvessels.** Corresponds to Figure 1F. HUVECs transduced with mScarlet-tagged c-Src mutants (magenta) grown in PDMS microfluidic vessels containing 2.5 mg/mL collagen matrix for 3 days before fixing. Immunofluorescent staining was performed for VE-Cadherin (green), F-Actin (cyan), and nuclei (DAPI; blue). 3D projection was generated using Imaris software.

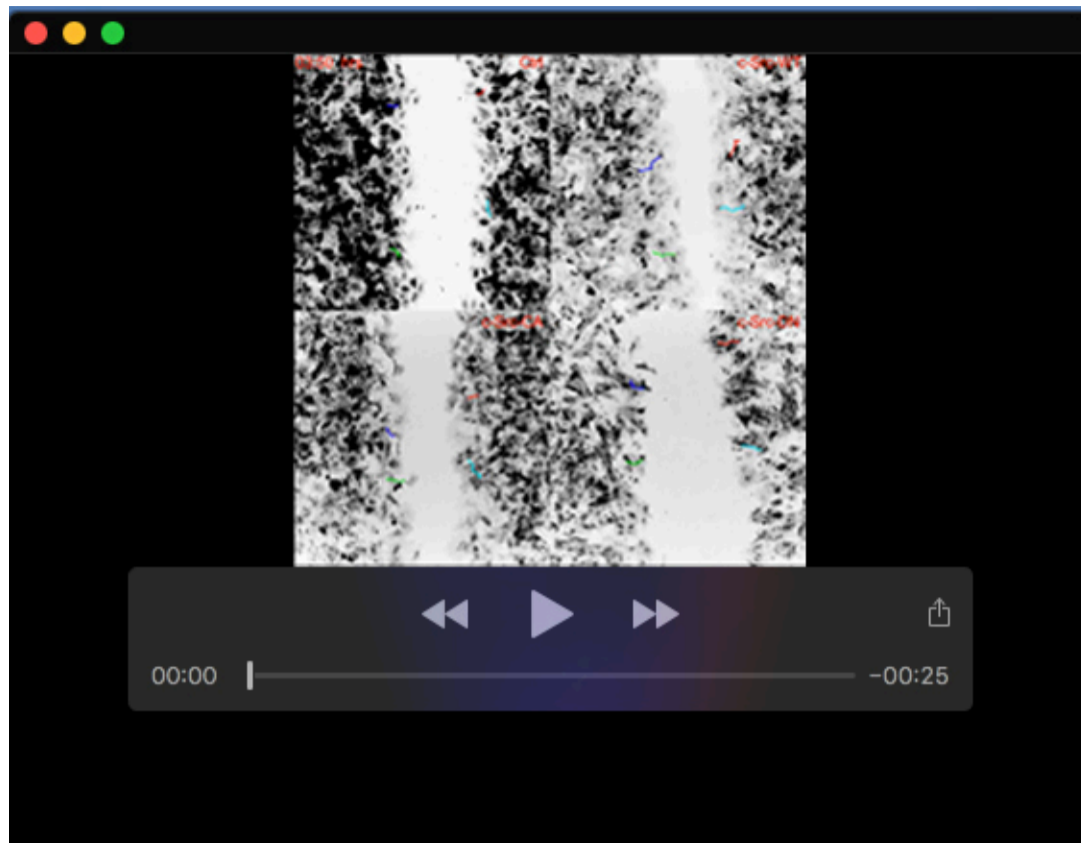

**Movie 3. Constitutively active c-Src reduces cell migration in 2D.** Corresponds to Supplementary Fig. 4A. HUVECs transduced with mScarlet-tagged c-Src mutants migrating in a scratch assay for live imaging of mScarlet (black) at 10 min interval over 15 h.

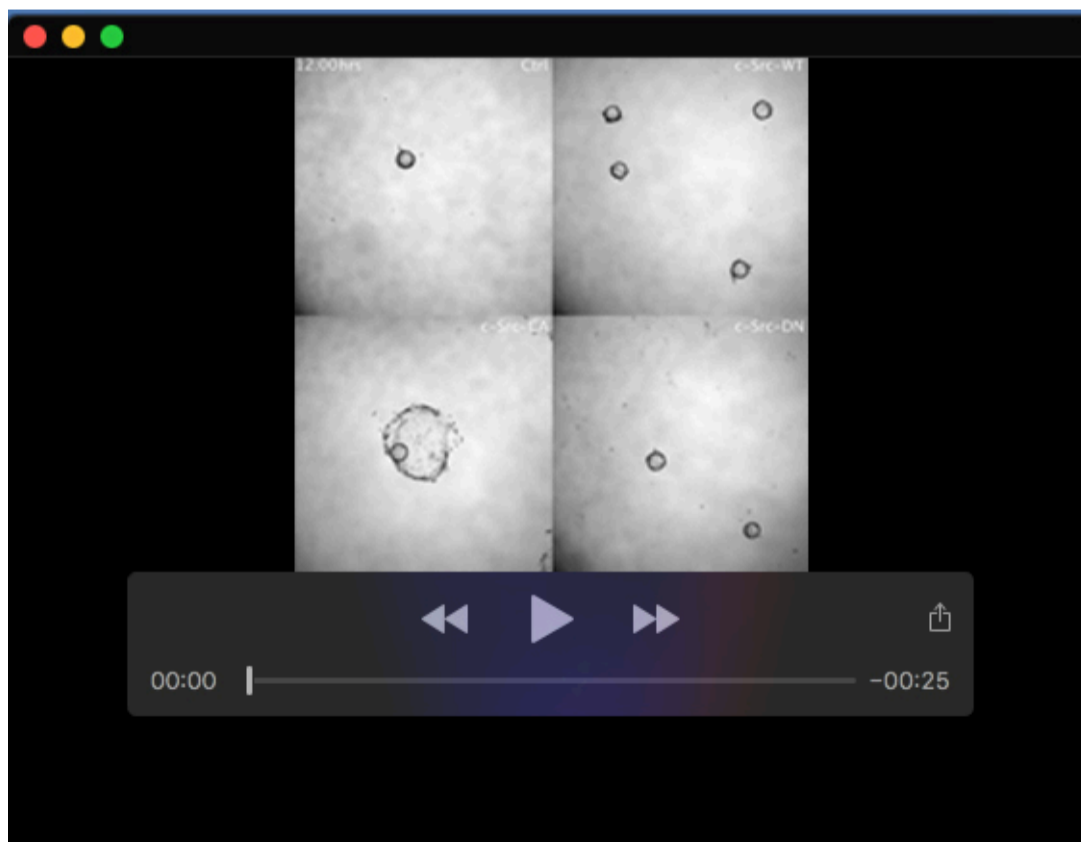

**Movie 4. Constitutively active c-Src decreases 3D cell migration in a bead sprouting assay.** Corresponds to Figure 3E. HUVECs transduced with mScarlet-tagged c-Src mutants were grown in a 5 mg/mL fibrin gel bead sprouting assay for 5 days before live imaging of DIC at 30 min intervals over 72 h.
